1     **High-resolution secretory timeline from vesicle formation at the Golgi to fusion at**  
2                                   **the plasma membrane in *S. cerevisiae***

3             Robert M. Gingras, Abigail M. Sulpizio, Joelle Park, and Anthony Bretscher

4  
5     **All affiliations:** Department of Molecular Biology and Genetics, Weill Institute for Cell  
6     and Molecular Biology, Cornell University, Ithaca, NY 14853

7  
8     **Abstract:**

9             Most of the components in the yeast secretory pathway have been studied, yet a  
10     high resolution temporal timeline of their participation is lacking. Here we define the  
11     order of acquisition, lifetime, and release of critical components involved in late  
12     secretion from the Golgi to the plasma membrane. Of particular interest is the timing of  
13     the many reported effectors of the secretory vesicle Rab protein Sec4, including the  
14     myosin-V Myo2, the exocyst complex, the Igl homolog Sro7, and the small yeast-specific  
15     protein Mso1. At the trans-Golgi network (TGN) Sec4's GEF, Sec2, is recruited to Ypt31-  
16     positive compartments, quickly followed by Sec4 and Myo2 and vesicle formation.  
17     While transported to the bud tip, the entire exocyst complex, including Sec3, is  
18     assembled on to the vesicle. Before fusion, vesicles tether for 5s, during which the  
19     vesicle retains the exocyst complex and stimulates lateral recruitment of Rho3 on the  
20     plasma membrane. Sec2 and Myo2 are rapidly lost, followed by recruitment of cytosolic  
21     Sro7, and finally the SM protein Sec1, which appears for just 2 seconds prior to fusion.  
22     Perturbation experiments reveal an ordered and robust series of events during tethering  
23     that provide insights into the function of Sec4 and effector exchange.

24  
25  
26     **Introduction**

27             Proteins destined for the secretory pathway are made on the endoplasmic  
28     reticulum, transferred to the Golgi complex, from where they are sorted into secretory  
29     vesicles that are transported and ultimately fuse with the plasma membrane to deliver  
30     their cargo. This pathway has been highly conserved in eukaryotes, from budding yeast  
31     to animal and plant cells. Indeed, many of the proteins involved in the secretory  
32     pathway were first identified and characterized in yeast (Novick et al., 1980; Novick,  
33     2014), which remains the organism in which the secretory pathway is best understood.  
34     Despite several decades of research, during which the general function of the major  
35     proteins involved has been elucidated, many of the components have not yet been

36 visualized *in vivo* at a spatiotemporal resolution sufficient to assess their order of action.  
37 A similar timeline has been previously defined for the events and components of yeast  
38 endocytosis, a process which involves hundreds of copies of some proteins and takes on  
39 the order of 10-12 seconds (Picco et al., 2015), but this work represents the first such  
40 timeline for exocytosis, the totality of which occurs over approximately 5 seconds.

41 This laboratory has previously analyzed and imaged the transport of budding  
42 yeast secretory vesicles, marked by the Rab Sec4, from the Golgi to the plasma  
43 membrane. Initial studies showed that secretory vesicles are transported by the myosin-  
44 V motor protein, Myo2 along actin cables at about  $3\mu\text{m/s}$  (Donovan and Bretscher,  
45 2012, 2015a; Santiago-Tirado et al., 2011; Schott et al., 1999, 2002). In the current study  
46 we sought to build on these results by imaging components involved in secretory  
47 vesicle biogenesis and exocytosis individually and in combination at rates significantly  
48 faster than previously achieved. Our goal was to generate a timeline along which the  
49 participation of each component could be recorded. Of particular interest is the timing  
50 of effectors of Sec4, the Rab protein which associates with secretory vesicles and has a  
51 number of known effectors, including the exocyst, the myosin-V motor Myo2, and Sro7  
52 (Guo et al., 1999; Jin et al., 2011; Rossi et al., 2018; Schott et al., 1999). This goal presented  
53 a number of technical challenges. First, all components had to be tagged in such a way  
54 as to minimally impair their function when expressed from their cognate promoters.  
55 Second, the number of molecules involved for many of the components is very small,  
56 making single, and especially double-label, imaging challenging. Third, since events  
57 occur in the timeframe of seconds, rapid frame capture was imperative to allow  
58 imaging at a significantly higher rate and resolution than has so far been achieved.

59 In this study we were able to image secretory vesicle biogenesis, with the arrival  
60 at the trans Golgi network of the Rab GEF Sec2, the Rab Sec4, and its effector the  
61 myosin-V motor Myo2. During transport, the secretory vesicle recruits the exocyst, the  
62 Sec4-effector complex necessary for vesicle tethering. During tethering, Rho3 is  
63 recruited, followed by Sro7, and then very briefly by the SM protein complex,  
64 Sec1/Mso1. Perturbation experiments show that this time-line is remarkably robust to  
65 levels of these and other components. Finally, we show that the associated Sec1 and  
66 Mso1 have redundant membrane-recruitment domains that aid its surprisingly fleeting  
67 participation during exocytosis. This time-line, together with an estimation of the  
68 number of molecules of each component involved and their known functions, provides

69 a framework to better understand biogenesis of secretory vesicles and their  
70 consumption at the plasma membrane.

71  
72

### 73 **Results**

#### 74 **Secretory vesicle formation and transport from the trans-Golgi network (TGN)**

75 To capture secretory vesicle formation at the Golgi, we needed a marker for the *trans*-  
76 Golgi network (TGN). At the TGN, a GTPase cascade results in the generation of  
77 secretory vesicles (Novick, 2016). The Arf-GEF Sec7 activates Arf1, which in turn  
78 recruits Pik1-Frq1 (the phosphatidylinositol 4-kinase complex) and the TRAPII Rab-GEF  
79 complex. TRAPII then recruits Ypt31/32 (Rab11 homologs), which recruits another Rab-  
80 GEF Sec2, which finally activates and recruits the secretory vesicle Rab, Sec4 (Thomas et  
81 al., 2019; Thomas and Fromme, 2016; Walch-Solimena et al., 1997). Ypt31/32 and Sec7  
82 have frequently been used as interchangeable TGN markers; however, Ypt31/32 level  
83 has recently been shown to peak on compartments a full eight seconds after Sec7  
84 (Highland and Fromme, 2021). While endogenously tagged Sec7-mNeonGreen  
85 occasionally appears to fragment into small compartments or vesicles, most Sec7  
86 appears to dissipate around the time of fragmentation, leaving resulting vesicles  
87 difficult to identify (Figure 1 Supplement 1). By contrast, mNeonGreen(mNG)-tagged  
88 Ypt31 can be followed through vesiculation and appears to remain on vesicles through  
89 fusion with the plasma membrane, with a sizeable population of Ypt31 remaining on  
90 the membrane within the bud (Figure 1A). For this reason, we assessed the timing of  
91 recruitment of Sec2, Sec4, and a Myo2-marker (*see* Figure 1 Supplement 2 for  
92 construction) to mScarlet-Ypt31 marked compartments.

93 All three components appeared to briefly colocalize with Ypt31 before breaking-  
94 off as a nascent secretory vesicle from the remaining portion of Ypt31, then moving  
95 diffusively, and finally being transported linearly towards the bud (Figure 1A). Sec2  
96 first appeared on the Ypt31-containing TGN approximately two seconds prior to  
97 separation, whereas Sec4 and the Myo2-marker appeared approximately one second  
98 before separation, and, presumably, about one second after Sec2 (Figure 1B-E). The  
99 close temporal proximity of Sec4 and Myo2 arrival suggests that Myo2 is likely the first  
100 effector of Sec4 recruited to secretory vesicles. While all three were found to be rapidly  
101 transported towards the bud following separation from the TGN—generally in under

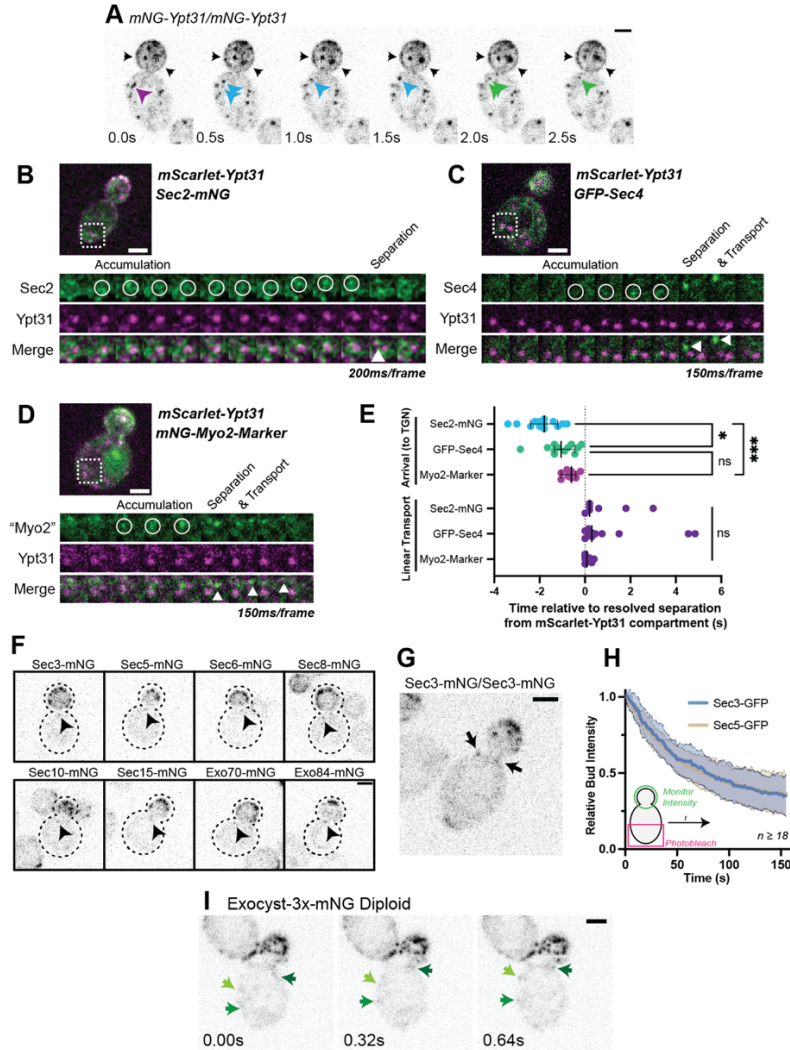

**Figure 1: Recruitment of Sec2, Sec4, and Myo2 precede secretory vesicle budding from the TGN and all exocyst components are on secretory vesicles before arrival at the plasma membrane.** A) An example of mNG-Ypt31 TGN vesiculation in a diploid cell. Colored arrowheads follow successive fragmentation of an initial compartment. Black arrows highlight mNG-Ypt31 on the plasma membrane. B) Timeseries example of Sec2-mNG recruitment to and budding from an mScarlet-Ypt31-marked compartment in a diploid cell. Single plane video. C) Timeseries example of GFP-Sec4 recruitment to and budding from an mScarlet-Ypt31-marked compartment in a diploid cell. Single plane video. D) Timeseries example of an mNG-Myo2-marker being recruited to and budding from an mScarlet-Ypt31-marked compartment in a diploid cell. Single plane video. E) Order of recruitment to Ypt31 TGN compartments aligned by apparent separation of signal from the compartment. Budded vesicles were generally transported linearly towards the bud in under a second. Median  $\pm$  95% CI.  $n \geq 10$ . \*,  $p \leq 0.05$ ; \*\*\*,  $p \leq 0.001$ . F) Localization of mNG-tagged exocyst components in haploid cells. Sum projection of a  $1.5\mu\text{m}$  vertical volume surrounding the bud neck. Arrowheads indicate a single vesicle approaching the bud neck in each. All scaled equally; Bar on Exo84,  $2\mu\text{m}$ . G) Additional example of mNG-Sec3 localizing to puncta approaching the bud neck in homozygously-tagged diploid cells. H) Fluorescence Loss in Photobleaching (FLIP) experiment comparing the recycling of Sec3 or Sec5 from the bud. Mean curve  $\pm$  SD,  $n \geq 18$ . I) Exocyst-3x-mNG faintly localizes to vesicles earlier in the mother. Compare the moving signals identified by green arrows to any punctum within the bud. All bars,  $2\mu\text{m}$ .

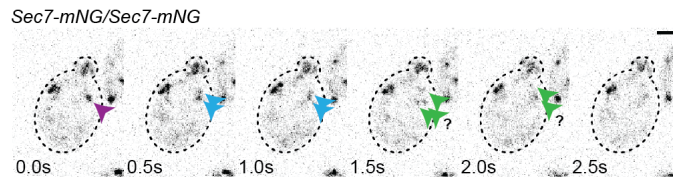

Figure 1 Supplement 1: An example of apparent Sec7-mNG TGN fragmentation.

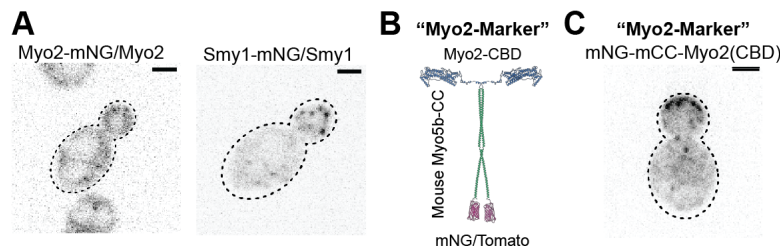

Figure 1 Supplement 2: Rationale for and construction of the Myo2 marker. A) One copy of endogenous Myo2 tagged with mNG in a diploid cell (left) shows no clear punctate localization due to the relatively high cytosolic background, however, one copy of Smy1-mNG (right) permits identification of clear vesicles. B) mNeonGreen or one copy of Tomato were tagged to a portion of the coiled coil domain of mouse myosin 5b of similar length to the Myo2 coiled coil, to facilitate dimerization of the marker without heterodimerizing with endogenous Myo2. This was fused to the C-terminal cargo-binding domain of Myo2 to maintain normal Myo2 cargo recognition. C) an example of mNG-mCC-Myo2(CBD) localization in a diploid cell.

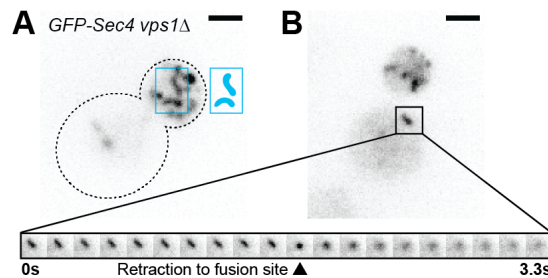

Figure 1 Supplement 3: A) GFP-Sec4 localizes to larger fusion-competent compartments in a vps1-null. B) A large GFP-Sec4 compartment in a vps1Δ haploid cell aberrantly fusing with the plasma membrane in the mother. Sum Projections. See videos 3 and 4.

102 half a second—only compartments marked with Sec2 or Sec4 appeared capable of  
103 moving diffusely for up to several seconds, suggesting that at least some vesicles can  
104 separate from the TGN without first acquiring Myo2.

105 It's remarkable that the machinery driving secretory vesicle formation has not yet  
106 been identified. The field has long held that since secretion itself is an essential process,  
107 formation of the classical 80-100nm secretory vesicles must be carried out by similarly  
108 essential components. Progress in this regard has been at least partially hampered by  
109 the observation that there appears to be more than one redundant pathway ultimately  
110 leading to exocytosis (Harsay and Bretscher, 1995). Our preliminary experiments  
111 examining the non-essential Vps1, which has been implicated in a late step of the  
112 secretory pathway (Gurunathan et al., 2002; Harsay and Schekman, 2007), suggest that  
113 it is directly involved in the formation of at least one class of secretory vesicle. Loss of  
114 this small GTPase which is known to act at the endosome (Chi et al., 2014), results in  
115 cells containing larger compartments capable of maturing to the point that they recruit  
116 Sec4 and apparently fuse with the plasma membrane (Figure 1 Supplement 3). This  
117 directly challenges the notion that the 80-100nm vesicles themselves are essential for  
118 secretion, but will need to be examined more closely in future studies.

119 Ypt31 and Ypt32 are often described interchangeably as they are considered  
120 functionally redundant (deletion of one or the other is consistent with viability, whereas  
121 loss of both is lethal). Interestingly, while the relative recruitment timing of Sec2 and  
122 Sec4 was similar when compared to Ypt32 compartments (Figure 1 Supplement 4A),  
123 relative Ypt32 to Ypt31 ratios appeared to mark subtly different compartments, with  
124 Ypt32 being more prominent on compartments within the bud (Figure 1 Supplement 4B  
125 and C). This trend of compartments within the bud carrying a higher concentration of  
126 Ypt32 also held when the markers on Ypt31 and Ypt32 were reversed and only  
127 expressed from endogenous promoters (Figure 1 Supplement 4D). An intriguing  
128 possibility is that Ypt32-enriched TGN within the bud could represent the more early-  
129 endosome-like TGN compartments with which endocytic cargo colocalize (Day et al.,  
130 2018).

131 We next examined the recruitment of the exocyst to secretory vesicles. The  
132 exocyst complex, comprised of single copies of Sec3, 5, 6, 8, 10, 15, Exo70, and Exo84,  
133 tethers secretory vesicles to the plasma membrane before fusion and is primarily  
134 thought to localize to the vesicles themselves, ahead of membrane delivery (Boyd et al.,

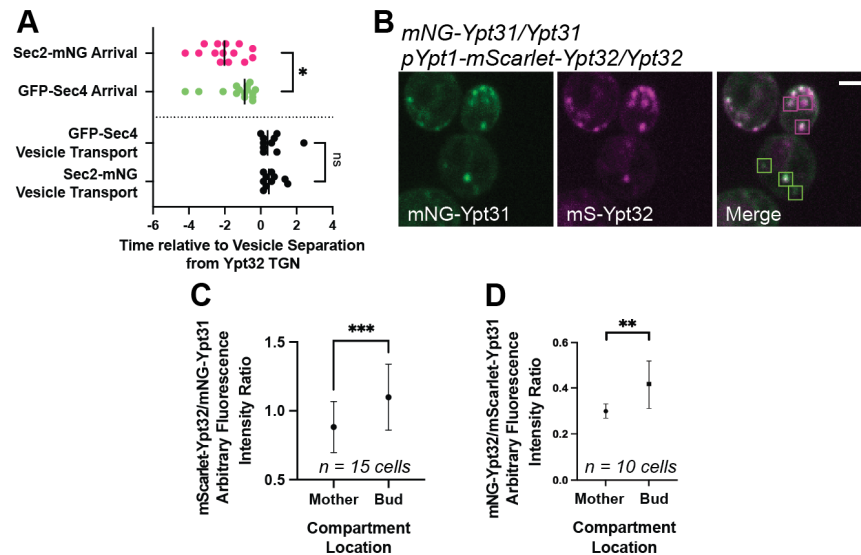

Figure 1 Supplement 4: A) Replication of Sec2/Sec4 separation from Ypt32-positive TGN compartments.  $n \geq 10$ . \*,  $p \leq 0.05$ . B) Example of Ypt31/32 localization, highlighting more Ypt31-dominant compartments in the mother and Ypt32-rich compartments in the bud. C and D) quantification of arbitrary Ypt32/Ypt31 fluorescence intensity ratio for compartments in the mother and bud for mNG-Ypt31 mScarlet-Ypt32 (C) or mScarlet-Ypt31 mNG-Ypt32 (D). Compared via paired students t-test. \*,  $p \leq 0.05$ ; \*\*\*,  $p \leq 0.001$ .

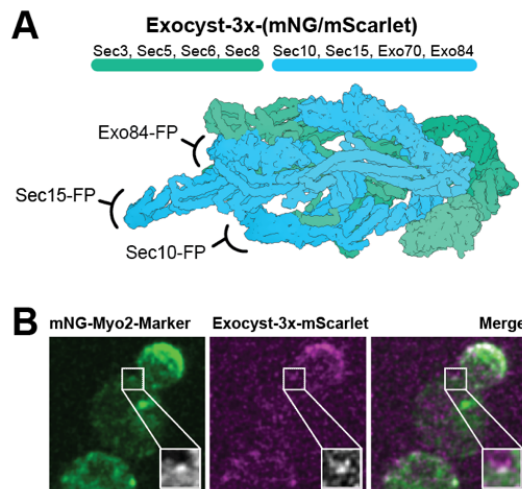

Figure 1 Supplement 5: A) Exocyst-3x-tag construction. B) Colocalization example of Exocyst-3x-mScarlet with Myo2-Marker. Single Plane.

135 2004). Sec3, however, has long been suggested to be a ‘landmark’ of secretory vesicle  
136 tethering—residing on the plasma membrane, apart from other seven subunits of the  
137 complex on the vesicle itself. This long-standing model suggests that once a vesicle  
138 comes into proximity of the plasma membrane, Sec3 then joins the bulk of the complex  
139 to complete the exocyst and facilitate tethering (Finger et al., 1998; Wiederkehr et al.,  
140 2003). More recent studies suggest that the yeast exocyst complex is an obligatory  
141 heterooctamer, with Sec3 always being bound to the other components with no  
142 discernible subcomplexes (Heider et al., 2016).

143 In this study, each exocyst component, including Sec3, was individually tagged  
144 with mNeonGreen. When each component was imaged, they could be seen on vesicles  
145 in the mother cell, although clear vesicular localization was generally only noticeable in  
146 immediate proximity to the bud neck and within the bud itself (Figure 1F, G).  
147 Additionally, fluorescence loss of Sec3 and Sec5 from the bud during constant  
148 photobleaching (‘FLIP’) of the mother cell was identical, suggesting that Sec3 recycles to  
149 the mother cell at the same rate as other exocyst components (Figure 1H). Thus, Sec3  
150 appears to be a component of the octomeric exocyst complex in vivo that associates  
151 with secretory vesicles and is not a spatial ‘landmark’ component of the exocyst.

152 Localization of the exocyst to moving vesicles in the mother only became slightly  
153 more apparent upon multiply-tagging the complex with one copy of mNeonGreen on  
154 each of three subunits (Exocyst-3x-mNG; Figure 1I, Figure 1 Supplement 5). This stands  
155 in contrast to Sec4 or Sec2 which could be readily observed on vesicles at all points  
156 within the mother, indicating that exocyst association with vesicles occurs well after  
157 vesicle biogenesis and during transport.

158

### 159 **Improved techniques for the imaging of yeast exocytosis**

160 Our previous study to examine secretory vesicle tethering utilized standard  
161 spinning disk confocal imaging of the cellular volume surrounding the bud neck of  
162 haploid *GFP-Sec4* cells (Donovan and Bretscher, 2015b). As most of the Sec4 in the cell is  
163 vesicle bound and in the bud, all the GFP signal in the bud was initially bleached and  
164 then incoming GFP-positive secretory vesicles were followed. An average of 22 vesicles  
165 enter the bud per minute (Figure 2A). The previous technique of intentionally  
166 photobleaching the bud thus necessarily relied on fortuitously timed secretory vesicle



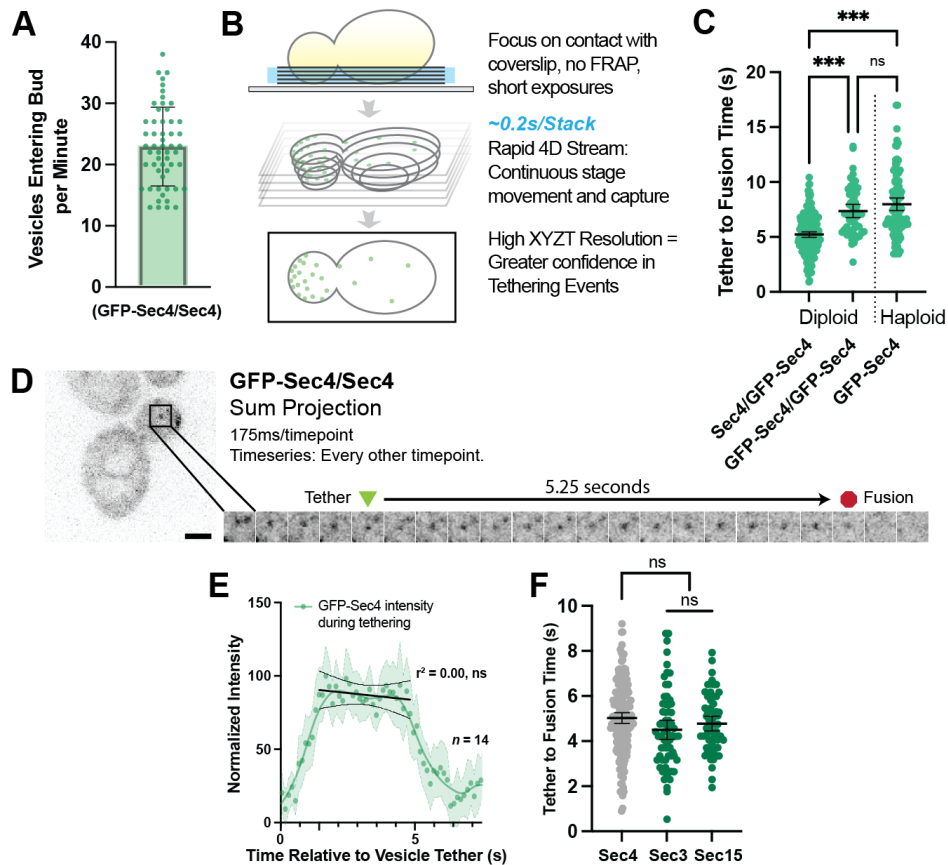

**Figure 2: Secretory vesicles tether for about 5s before fusion.** A) Approximately 22 vesicles enter the bud per minute. Mean  $\pm$ SD. B) Schematic diagram of improved volumetric imaging technique used in this study. See Video 1 for example. C) Collected data of all timed GFP-Sec4 tethering events in wildtype GFP-Sec4/Sec4 cells as well as homozygously-tagged diploids and GFP-Sec4 haploids Means  $\pm$ 95%CI. GFP-Sec4/Sec4 Mean: 5.02s,  $n = 196$  events, others  $n \geq 50$ . \*\*\*,  $p < 0.001$ . D) Example of GFP-Sec4 vesicle tethering and fusion from a GFP-Sec4 heterozygously-tagged diploid. Sum projection. See Video 2. E) GFP-Sec4 fluorescence intensity is roughly constant through tethering. Local weighted regression (LOWESS; green) and linear regression curves (during tethering; black) added for visual interpretation. F) Apparent tethering time of vesicles marked carrying Sec3-mNG (Mean: 4.55s) or Sec15-mNG (Mean: 4.77s) is similar to tethering time of vesicles marked by GFP-Sec4. Mean  $\pm$  95%CI.

167 formation and transport from the mother and for that vesicle to then tether within the  
168 small vertical observation window centered around the bud neck. This technique  
169 confined critical information on vesicle tethering to the lowest resolution domain, the  $z$ -  
170 axis.

171 To overcome this limitation, we adjusted the imaged volume to the region of the  
172 cell proximal to the coverslip so that the majority of information regarding vesicle  
173 position was shifted into the higher resolution  $x$ - and  $y$ -axes (Figure 2B). Instead of  
174 photobleaching, we utilized the larger volume and plasma membrane surface area of  
175 mid-sized diploid buds to identify individual vesicles that tethered, fused, and could be  
176 confidently discerned from nearby vesicles. This three-dimensional capture was  
177 performed by streaming EM-CCD frames directly to disk using short exposures  
178 (between 10-50ms), constant laser excitation, and continuously moving the stage  
179 vertically. By removing the need for discrete stage stepping, camera-shuttering, and  
180 laser firing this drove down the capture time per frame, resulting in typical captures of  
181 175ms per stack of six planes for brighter signals from more abundant proteins, and less  
182 than a third of a second for very low abundance proteins. This is far faster than the  
183 capture of five planes in 1.5s used in our earlier studies.

184 With these adjustments and careful analysis of these videos in 3D projections  
185 (Video 1), we were able to identify far more unambiguous tethering and fusion events  
186 than previously possible (Figure 2C, Video 2) and could even identify many events per  
187 cell in some captures (Figure 2 Supplement 1). Analyzing many such events resulted in  
188 diploids resulted in a tether-to-fusion time of approximately five seconds (Figure 5D).  
189 Interestingly, we found early on in this study that the presence of the GFP-tag on Sec4  
190 itself affects Sec4 function. A significant increase in tether-to-fusion time was seen when  
191 no untagged Sec4 was available (such as in a GFP-Sec4/GFP-Sec4 diploid or GFP-Sec4  
192 haploid; Figure 2D). This difference indicated that the heterozygous diploid GFP-  
193 Sec4/Sec4 strain would be the most physiological framework in which to explore  
194 secretory vesicle tethering. By measuring the average intensity of GFP-Sec4 signal on  
195 tethered vesicles in the diploids, we found that GFP-Sec4 signal on the vesicle remains  
196 constant throughout the duration of tethering, only rapidly disappearing after several  
197 seconds, suggesting that Sec4 is not extracted from the vesicle during tethering ahead of  
198 fusion (Figure 2E).

**A** *GFP-Sec4/Sec4* (Visualizing Multiple Tethered Vesicles)

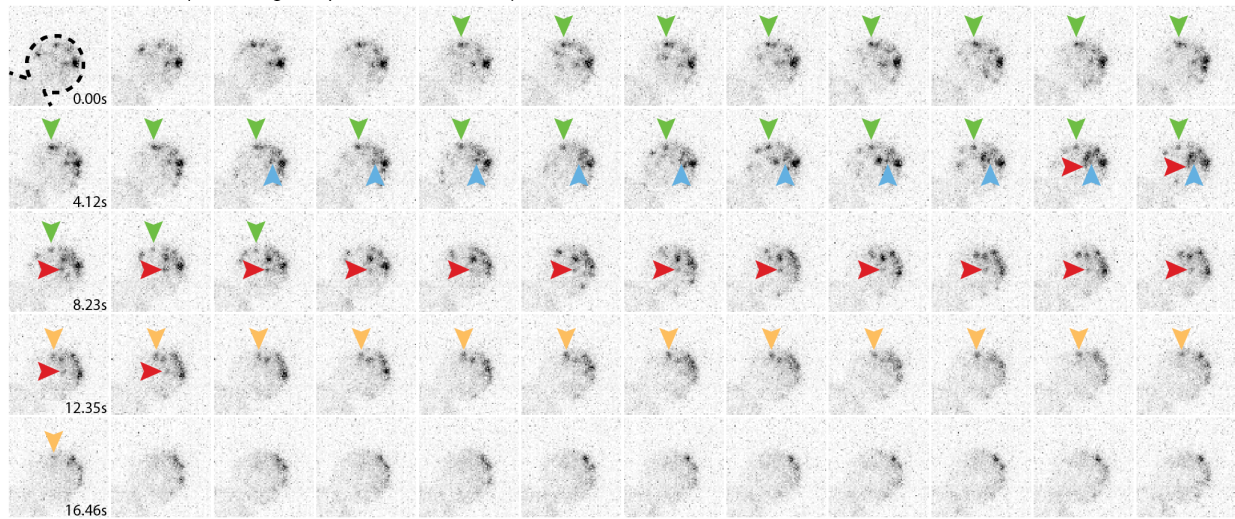

**B** Tether-to-Fusion Time

- ▶ = 7.89s
- ▶ = 3.43s
- ▶ = 5.49s
- ▶ = 4.46s

Average: 5.31s

Figure 2 Supplement 1: A) Example of multiple vesicle tethering events in a single cell. B) Collected timings of events shown in A.

199           Next, we determined the time that exocyst components Sec3-mNG and Sec15-  
200 mNG associate with tethered vesicles. Both Sec3-mNG and Sec15-mNG remain on  
201 tethered vesicles for about the same time as the tether-to-fusion time of GFP-Sec4,  
202 although both consistently appeared slightly shorter (Figure 2F). Although this  
203 difference is not statistically significant, it is consistent with reports showing that the  
204 mammalian exocyst remains associated with exocytic vesicles roughly until fusion. Sec3  
205 and Sec15 represent constituent components of the two putative exocyst sub-  
206 assemblies (Sec3, 5, 6, 8 vs. 10, 15, Exo70, Exo84) and we do not see a significant  
207 difference in the residence timing of the two sub-complexes, as has been reported in  
208 mammalian cells (Ahmed et al., 2018).

209           Earlier studies employing haploid GFP-Sec4 strains reported a longer tethering  
210 time of about 15-18s (Alfaro et al., 2011; Donovan and Bretscher, 2015b), which cannot  
211 be explained alone by the use of a haploid GFP-Sec4 strain alone. During the current  
212 study, it became evident that a lower temporal resolution could result in longer  
213 apparent vesicle tethering due to a newly observed phenomenon of tethering “hot-  
214 spots”. At these transient locations, secretory vesicles can be seen to tether sequentially  
215 (Figure 3A) and/or simultaneously (Figure 3B, Video 3). It is not currently possible to  
216 quantify the frequency with which this occurs due to the complexity of tracking the  
217 many vesicles within the bud for their entire pre-fusion lifetime. One possibility is that  
218 tethering hot-spots are near the end of actin cables that are used to transport vesicles to  
219 the plasma membrane. Disruption of actin cables with Latrunculin B resulted in an  
220 accumulation of secretory vesicles in the mother (Figure 3C) thereby precluding  
221 obtaining a definitive answer to the involvement of actin cables ends as hot-spots.  
222 Moreover, this disruption caused a significant elongation of tethering-to-fusion time  
223 with individual tethering events being moderately easier to identify due to their more  
224 broad distribution within the bud (Figure 3D, E). Interestingly, though puncta and  
225 patches of Bni1 (the formin within mid-sized buds responsible for actin cable assembly)  
226 only persist for slightly longer than the lifetime of a single vesicle tethering event  
227 (mean, 6.4s), patches of another exocytic protein, Boi2, were capable of lasting  
228 significantly longer (median, 16.5s; Figure 3F). The redundant Boi1/2 proteins have  
229 been suggested to play a role in both actin and vesicle tethering regulation (Glomb et  
230 al., 2020; Masgrau et al., 2017) and, indeed many, but not all, vesicles appear to tether at  
231 Boi2-mNG puncta (Figure 3G). While this could potentially explain the underlying

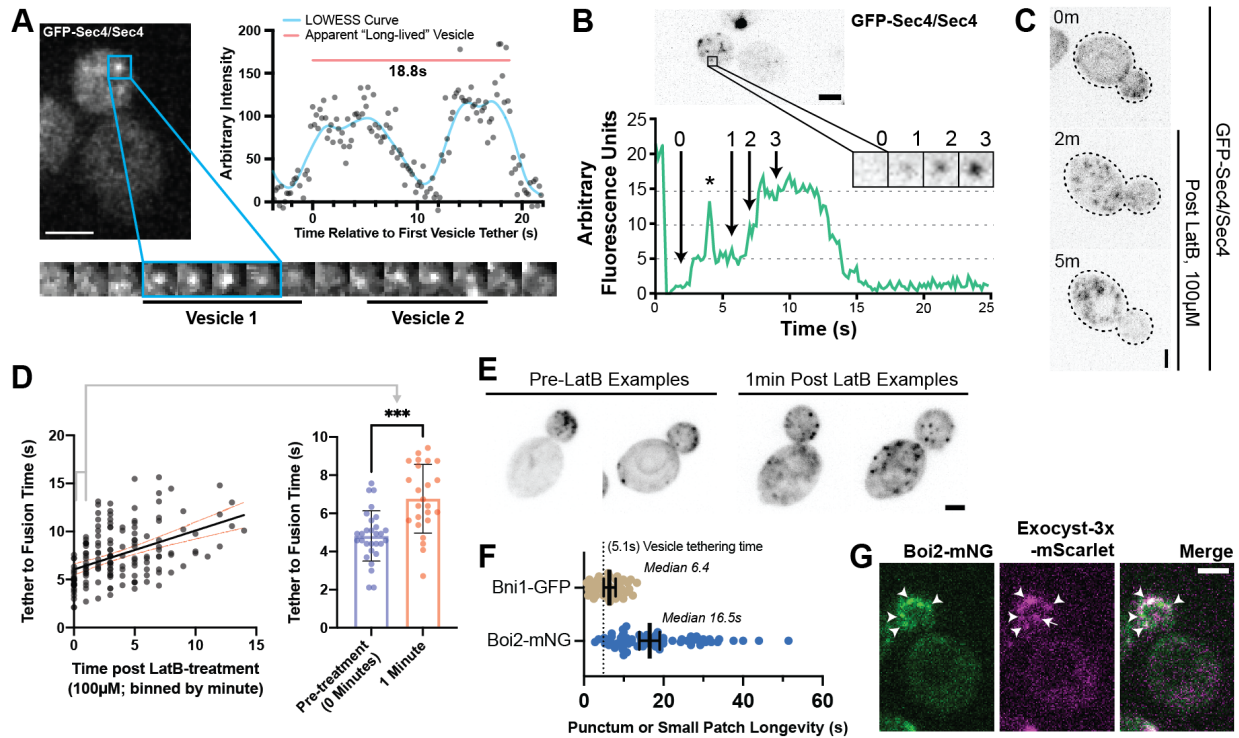

**Figure 3: Tethering Hotspots Exist** *A*) Sequentially tethering vesicles may appear as long-lived events in captures with low spatiotemporal resolution, especially when considering the elongated tethering time in cells with no untagged Sec4 (as in Figure 2C). Images were captured at 176ms per frame. Inset time-lapse shown with 10x lower time resolution. *B*) Additional example of "hot-spot" tethering shows 3 vesicles arriving and tethering in rapid succession at one un-resolvable location (see Video 3). Though they tether at separate times, they appear to fuse at roughly the same time. Asterisk marks signal from a bright vesicle that passed the observed position. *C*) Secretory vesicle formation continues even in the absence of actin cables. *D*) Disruption of actin cables with LatrunculinB (LatB) immediately results in elongated GFP-Sec4 vesicle tether-to-fusion time. \*\*\*,  $p \leq 0.001$  by *t*-test. *E*) Several examples of clustered GFP-Sec4 secretory vesicle localization in diploid cells not treated with LatB and examples of more dispersed vesicle tethering locations in cells one minute after LatB treatment. Sum projection of cell bottom. *F*) Boi2 patches are longer lived than individual vesicles or even Bni1 patches, suggesting a potential explanation for the observation of tethering "hot-spots". *G*) Exocyst-3x-mScarlet frequently colocalizes with Boi2-mNG puncta on the plasma membrane. Arrowheads indicate vesicles colocalized with Boi2, arrow indicates a tethered vesicle not colocalized with Boi2.

232 biology of tethering hot-spots, the actual mechanisms and dynamics of tethering hot-  
233 spots will need to be explored in a future study.

234

### 235 **Modulation of tethering by Sec4-GTP state**

236 Sec4 GTP-hydrolysis, as promoted by the genetically redundant Rab-GAPs Msb3  
237 and Msb4, is believed to be important for maintaining proper tether-to-fusion time  
238 (Donovan and Bretscher, 2015b). Homozygous deletion of *msb4* with heterozygous  
239 deletion of *msb3* (*msb3Δ/MSB3 msb4Δ/msb4Δ*) leads to a modest but significant increase  
240 in tether-to-fusion time, while the opposite (*msb3Δ/msb3Δ msb4Δ/MSB4*) results in much  
241 greater increase in tether-to-fusion time. A similar effect on tethering can be seen when  
242 one copy of Sec4 in a diploid is replaced with the constitutively active *Sec4<sup>(Q79L)</sup>* allele  
243 (Figure 4A). Excess active Sec4 is seen on the plasma membrane of *msb3Δ/msb3Δ* cells  
244 (Figure 4B). Thus, the longer tethering times observed could be directly due to delayed  
245 hydrolysis of Sec4-GTP on the vesicle, or indirectly due to excess active Sec4 on the  
246 plasma membrane which may be sequestering secretory effectors, limiting their  
247 availability for tethered vesicles, and thereby elongating tethering time. To distinguish  
248 between these, we expressed a constitutively active *mScarlet-Sec4<sup>(Q79L)</sup>-Ist2<sup>tail</sup>* (aka.  
249 *mScarlet-Sec4<sup>(Q79L)</sup>-PM*) which embeds into the plasma membrane (Figure 4C, left).  
250 Amazingly, there was no difference in vesicle tether-to-fusion time with expression of  
251 the constitutively active, plasma membrane-bound Sec4 (Figure 4C, right). Thus,  
252 delayed hydrolysis of vesicle-bound Sec4-GTP elongates tethering time. These results  
253 also highlight the inherent context-dependent regulation of exocytic factors and  
254 supports the idea that local coincidence detection mechanisms are important for the  
255 function of Sec4 effectors.

256 Limitation of GDI availability by heterozygous deletion of *Gdi1* also had no  
257 significant effect on vesicle tether-to-fusion time despite also resulting in accumulated  
258 Sec4 on the plasma membrane (Figure 4D,E). In addition to further supporting the  
259 conclusion that accumulated Sec4 on the plasma membrane does not interfere or  
260 elongate tether-to-fusion time, the fact that Sec4 can be retained in this way strongly  
261 supports that the rapid loss of Sec4 signal from a tethered vesicle is representative of  
262 fusion.

263

264

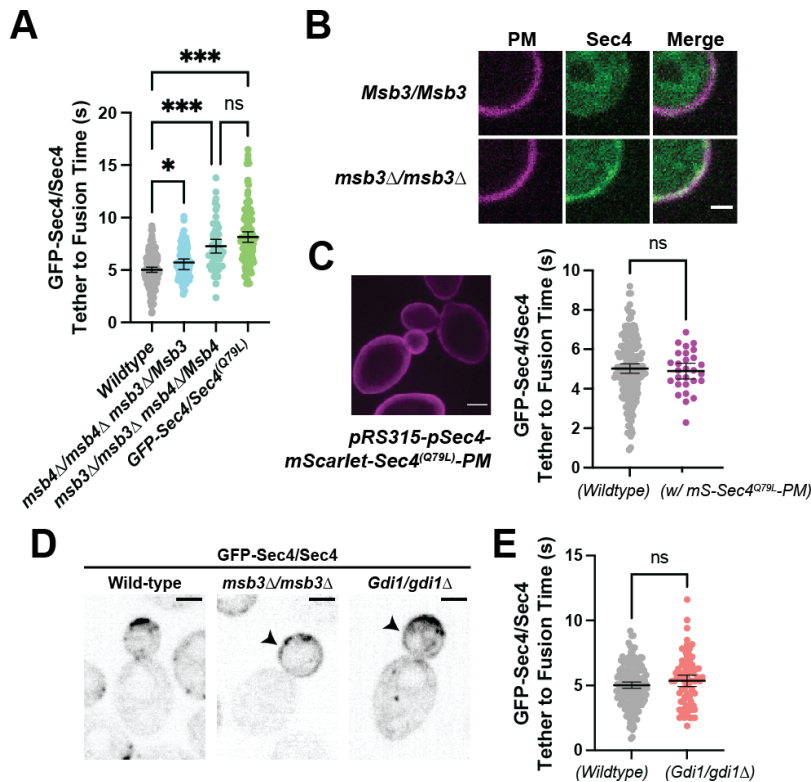

**Figure 4: Duration of vesicle tethering is modulated by the level of Sec4:GTP on the vesicle. *Msb3* likely acts on Sec4 twice to aid in efficient tethering and Sec4 recycling.** A) Homozygous deletion of *msb3* or replacement of one copy of Sec4 with a constitutively active allele results in significantly longer tether-to-fusion time, whereas similar deletion of *msb4* has a much milder effect. \*,  $p \leq 0.05$ ; \*\*\*,  $p \leq 0.001$ . B) Deletion of *msb3* results in GFP-Sec4 accumulation on the plasma membrane (PM). Unbudded cells shown for simplicity, though the same occurs in budded cells. PM is marked with mCherry-Ist2<sup>tail(2X)</sup>. Bar, 1  $\mu$ m. C) Expression of a constitutively active and plasma membrane-bound Sec4 has no effect on GFP-Sec4 vesicle tethering time. Ectopic Sec4:GTP on the plasma membrane is not the cause of elongated tethering times observed in *msb3*Δ and Sec4(Q79L). D) Heterozygous deletion of *Gdi1* (an essential protein) also induces Sec4 accumulation on the plasma membrane. E) Heterozygous deletion of *Gdi1* has no significant effect on secretory vesicle tether-to-fusion time.

## 265 **Defining the location and timing of components individually**

266 We next sought to examine how long other components involved in exocytosis  
267 were associated with tethered vesicles. To prevent potential perturbation of tethering by  
268 over-expression, single components were homozygously tagged in the genome and  
269 expressed exclusively under their own promoters. Components that were observed to  
270 reside on vesicles during transport were timed, much like with Sec4 itself, from the  
271 moment of tethering until punctate signal was lost. Components that appeared to only  
272 form stable punctate structures at the plasma membrane (i.e. not on moving vesicles)  
273 were timed from the first frame the punctum appeared to the last frame it was visible.

274 Unlike Sec4 and the exocyst complex, Sec2 and Smy1 appear to dissociate from  
275 secretory vesicles shortly after tethering (Figure 5A). Sec2 is the first protein observed to  
276 depart the vesicle, with Sec2-mNG puncta lasting on average 2.8 seconds after  
277 becoming stationary at the plasma membrane. Smy1, which associates with vesicle-  
278 bound Myo2 and resides on vesicles through transport (Lillie and Brown, 1994, 1992;  
279 Lwin et al., 2016), only remains associated with the vesicle for an average of 3s after  
280 tethering. Since tagged wildtype Myo2 cannot be observed due to a high cytoplasmic  
281 background of unactivated Myo2, Smy1 likely parallels Myo2 behaviour. Indeed,  
282 assessing the time of punctate signal loss of the Tomato-Myo2-marker supports that  
283 Smy1 and Myo2 dissociate around the same time in vesicle tethering (Figure 5  
284 Supplement 1).

285 Three additional exocytic components, Sro7, Mso1, and Sec1, were found to  
286 exclusively localize to puncta at the plasma membrane. Sro7 is a nonessential protein  
287 involved in polarity maintenance and secretion that directly binds and regulates the  
288 soluble SNAP-25 homolog, Sec9 (Hattendorf et al., 2007; Lehman et al., 1999). Earlier  
289 studies have suggested that Sro7 localizes broadly to the plasma membrane, however,  
290 this was shown via immunofluorescence following  $2\mu$  overexpression (Lehman et al.,  
291 1999). Imaging of Sro7-mNG expressed from its own promoter, shows that Sro7 does,  
292 indeed, localize to the plasma membrane, however, it does so in a polarized and  
293 punctate pattern similar to tethered vesicle localization (Figure 5B). The median  
294 longevity of Sro7 puncta was approximately 3.4s (mean, 3.8s; Figure 5A).

295 None of the Sro7 signal appeared to localize to diffusive or actively transported  
296 secretory vesicles, whether in the mother or bud. This non-vesicular localization was  
297 somewhat surprising as the redunant Sro7 and Sro77 are thought to be direct effectors



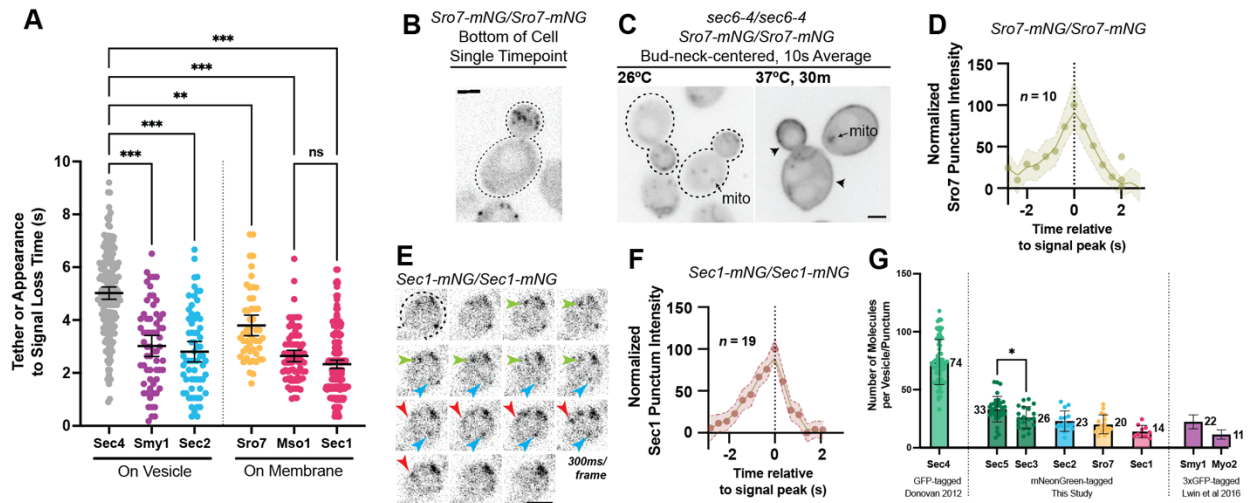

**Figure 5: Defining the location and timing of exocytic components individually** A) Independent timing from tether to disappearance for components residing on vesicles (Smy1-mNG, Sec2-mNG) and timing of punctum appearance to disappearance for components apparently residing on the plasma membrane (Sro7-mNG, Sec1-mNG, Mso1-mNG). All imaged in homozygously-tagged diploids in a manner as in Figure 2B. \*\*,  $p \leq 0.005$ ; \*\*\*,  $p \leq 0.001$ . See Figure 5 Supplement 2 for combined statistics. B) Sro7, a Sec4 effector, does not localize directly to vesicles and instead appears in short-lived puncta at the plasma membrane. Sum projection. Bar, 2µm. C) Disruption of secretory vesicle tethering via sec6-4 does not result in Sro7 accumulation on cytosolic vesicles, but instead accumulation at the plasma membrane. Mitochondrial autofluorescence is apparent due to the low signal intensity of Sro7-mNG. Bar, 2µm. D) Averaging multiple events shows that the timing of arrival and departure for Sro7 is roughly symmetrical. E) Timelapse of several Sec1-mNG puncta within the bud. Sum Projection. Captured as in Figure 2B. ~300ms per frame. Bar, 2µm. F) Averaging several Sec1-mNG localization events shows faster signal dissipation than accumulation. This is different from what is observed for another PM-localized protein Sro7 in (C). G) Collected data of number of molecules per vesicle of various components measured both in this study and other studies from our lab. \*,  $p \leq 0.05$ .

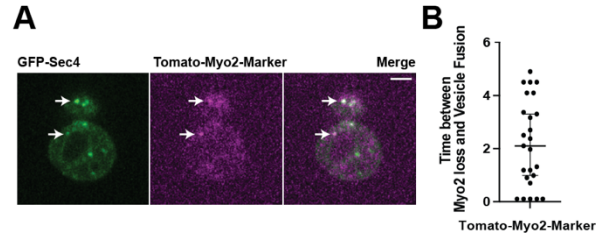

Figure 5 Supplement 1: A) A Myo2-marker co-imaged with GFP-Sec4 indicates loss of Myo2 occurs midway through tethering. B) Myo2 departs secretory vesicles just over 2 seconds before vesicle fusion on average, but this time varies widely.

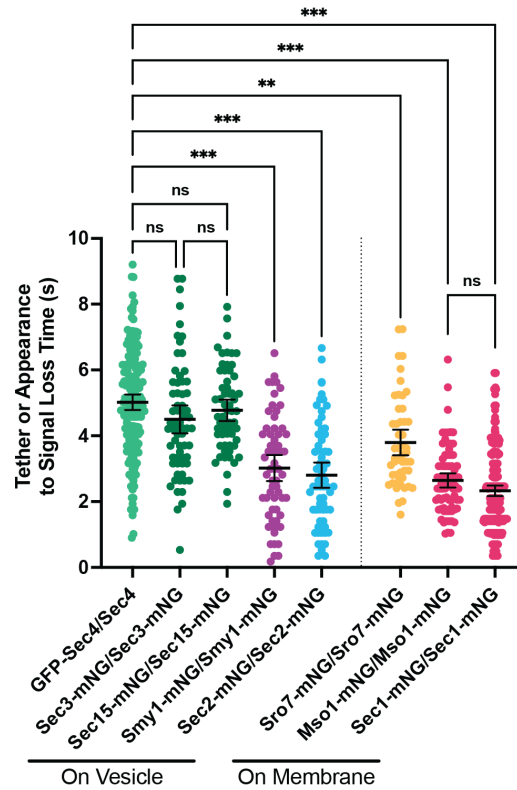

Figure 5 Supplement 2: Combined data from Figure 2F and 5A. All  $n \geq 50$  events, analyzed blind. To minimize the number of comparisons performed, these data were tested for differences among the group via Kruskal-Wallis and only the indicated post-hoc tests were performed, with corrections. See methods for additional details. \*\*,  $p \leq 0.005$ ; \*\*\*,  $p \leq 0.001$ .

298 of Sec4:GTP (Rossi et al., 2018; Watson et al., 2015). Additionally, disruption of vesicle  
299 tethering by a *sec6-4* mutation induced broad Sro7-mNG localization across the plasma  
300 membrane (Figure 5C), perhaps due to its known association with the exocytic SNARE  
301 Sec9. This result is also surprising as Sro7 has been reported to induce secretory vesicle  
302 clustering, at least when overexpressed (Rossi et al., 2020, 2014). The arrival and  
303 departure kinetics of Sro7, as measured by average punctum intensity over time, were  
304 roughly symmetrical, with the longevity before peak intensity being about equal to the  
305 longevity after the peak (Figure 5D).

306 Sec1, the SM (Sec1-Munc18) family protein responsible for directing secretory  
307 vesicle SNARE assembly, has primarily been visualized at low spatiotemporal  
308 resolution or via BiFC (Carr et al., 1999; Kustermann et al., 2017; Weber et al., 2010).  
309 Here, we visualized Sec1-mNG (Figure 5E, Video 4) and found the shortest localization  
310 timing of any exocytic component examined, with Sec1 puncta longevity having a  
311 median time of 2.1s (mean, 2.3s; Figure 5A). Interestingly, unlike Sro7, Sec1 arrival and  
312 departure times were different, with the accumulation of signal taking slightly longer  
313 than its dissipation following peak intensity (Figure 5F). This is potentially consistent  
314 with Sec1 functioning at the end of vesicle tethering, rapidly disappearing around the  
315 moment of membrane fusion. Mso1, a small nonessential protein tightly associated with  
316 Sec1 and suggested to be an effector of Sec4, was found to have a similarly short  
317 lifetime, not significantly different from Sec1 (median 2.5s, mean 2.6s; Figure 5A)(Weber  
318 et al., 2010; Weber-Boyvat et al., 2012).

319 To estimate the relative number of molecules associated with secretory vesicles,  
320 we determined the maximum fluorescence intensity, compared with the known  
321 standard Cse4-mNG (Lawrimore et al., 2011), of several components which had not  
322 been previously quantified, and added it to data from previous publications (Figure  
323 5G). The exocyst complex has previously been reported to localize with approximately  
324 15 complexes per vesicle (Picco et al., 2017) and this analysis, measuring mNeonGreen-  
325 tagged Sec3 and Sec5 on tethered vesicles, showed similar results ( $26\pm 9$  and  $33\pm 11$   
326 respectively). About  $23\pm 9$  molecules of Sec2 could be seen on vesicles during transport.  
327 Finally, very few copies of Sro7 ( $20\pm 8$ ) and Sec1 ( $14\pm 5$ ) were found to localize to their  
328 respective membrane puncta in the bud.

329

330

## 331 **Constructing a Timeline**

332 Having measured the timing of various components individually, we next  
333 sought to correlate these timings into a cohesive timeline of events from initial tethering  
334 to fusion. This endeavor was a complex one. Most of the proteins examined have a low  
335 number of molecules associated with each tethering event, so ensuring sufficient  
336 fluorescent intensity for meaningful detection of multiple markers, each expressed at  
337 endogenous levels, while maintaining a reasonable imaging frequency, was  
338 challenging. This was further complicated by an apparent perturbation encountered  
339 between some fluorescently-tagged protein pairs. Additionally, even the most abundant  
340 vesicular protein, Sec4, was not bright enough for our experiments when tagged  
341 heterozygously with mScarlet, the brightest currently available red fluorescent protein.

342 Unfortunately, GFP-Sec4 paired poorly with our best red vesicle marker Exocyst-  
343 3x-mScarlet, with tethering time as measured by GFP-Sec4 alone in this strain being  
344 somewhat elongated (Figure 6 Supplement 1). However, even in this strain we can see  
345 clearly that Sec4 and the exocyst depart from exocytic sites around the same time  
346 (Figure 6A). Fortunately, Exocyst-3x-mScarlet was able to be successfully utilized in  
347 combination with several other tagged components with minimal detriment.  
348 Additionally, since several components (Sec2, Myo2, Smy1, and the exocyst itself) are  
349 transported to the tethering site on the vesicle, alignment of loss of these components to  
350 the moment of tethering is easy, for example tracking the loss of a Tomato-Myo2-  
351 marker compared to GFP-Sec4, confirms that Myo2 begins dissociating shortly after the  
352 start of tethering (Figure 6B; Figure 5 Supplement 1).

353 One of the first non-vesicular components to colocalize with tethered vesicles  
354 after their arrival to the plasma membrane is Rho3. Though Rho3 plays an integral role  
355 in vesicle tethering, it has not been shown to be present on constitutive secretory  
356 vesicles themselves (Forsmark et al., 2011; Robinson et al., 1999). Rather, in wildtype  
357 cells, Rho3 is broadly resident on the plasma membrane with transient bud-localized  
358 patches of increased concentration (Figure 6 Supplement 2). Rho3 was visualized with a  
359 recently developed internal-mNG (imNG) tag and compared to the arrival of vesicles  
360 marked by Exocyst-3x-mScarlet (Figure 6C)(Gingras et al., 2020). Alignment of multiple  
361 such events illustrates that Rho3 peaks at sites of tethered vesicles about 1.5s after  
362 tethering (Figure 6D).

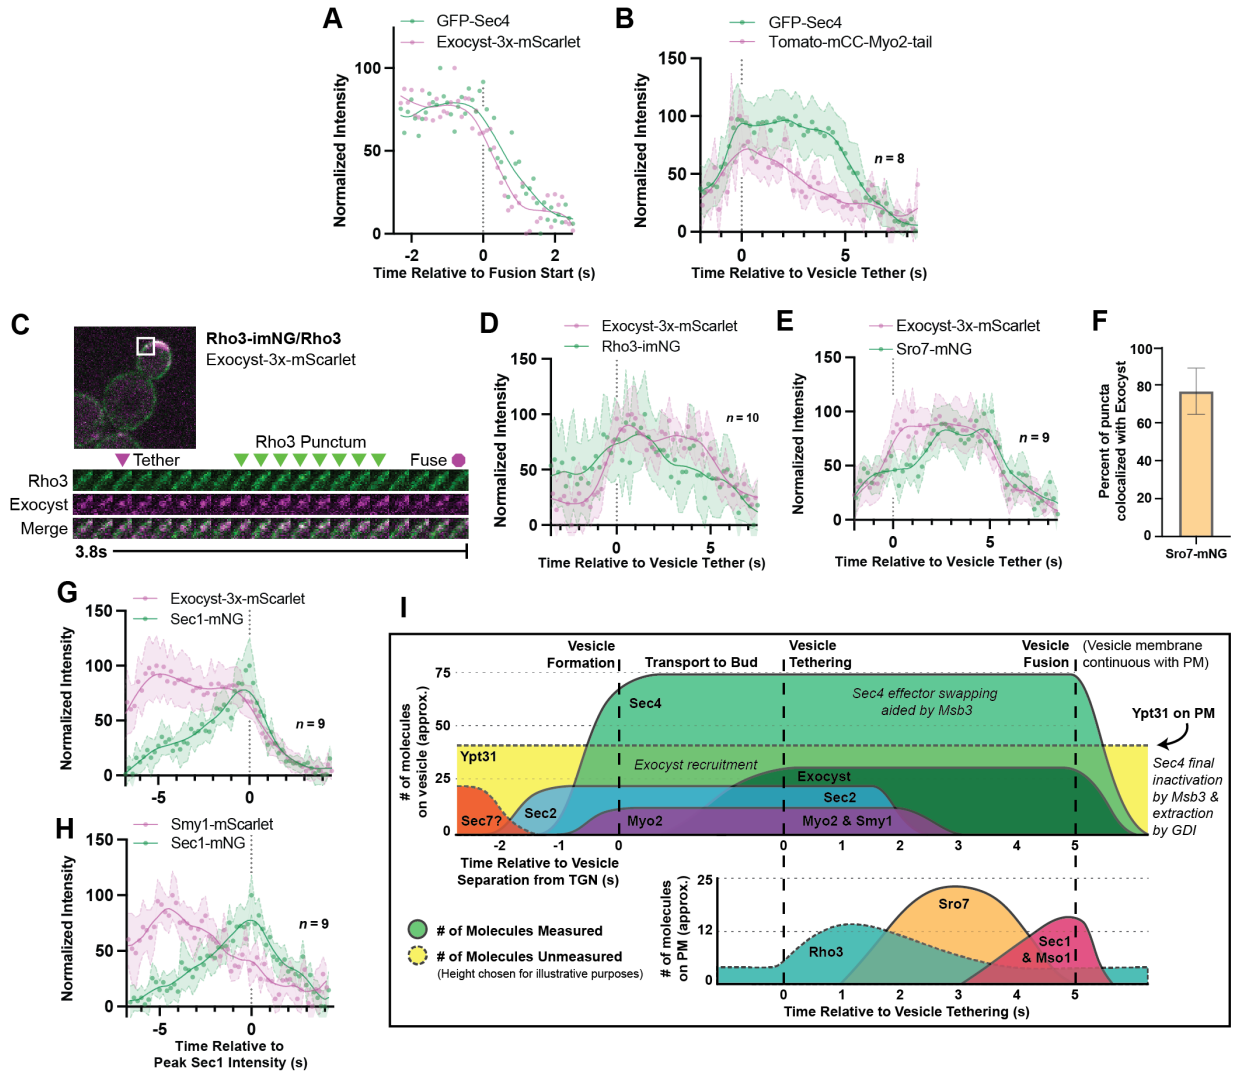

**Figure 6: Relative ordering of exocytic events and the tether-to-fusion timeline** A) Single example of vesicle fusion showing near simultaneous loss of Sec4 signal and the exocyst in GFP-Sec4/Sec4 Exocyst-3x-mScarlet. B) Averaging of several Sec4 vesicle tethering events shows that on average Myo2 begins dissociating from the vesicle around the start of tethering. C) Internally tagged Rho3-imNG on the plasma membrane concentrates briefly after Exocyst-3x-mScarlet vesicle tethering. D) Averaging several vesicle tethering events as in C illustrates that Rho3-imNG membrane intensity rises with Exocyst-3x-mScarlet arrival and peaks ~1s after vesicle tethering. Aligned by visual start of tethering. E) Averaging several Exocyst-3x-mScarlet vesicle tethering events shows that Sro7-mNG localization to vesicles peaks 3-4s after tethering. Aligned by visual start of tethering. F) Not all Sro7-mNG puncta clearly colocalize with exocyst-marked secretory vesicles. The fraction of Sro7-mNG puncta visually colocalized with the exocyst in still images was manually counted for > 10 cells across three biological replicates. Mean  $\pm$ SD. G) Averaging of several vesicle tethering events shows colocalization of Sec1-mNG and Exocyst-3x-mScarlet with Sec1 signal peaking around the moment of exocyst loss. Aligned by moment of peak Sec1 intensity. H) The start of Smy1-mScarlet loss from vesicles occurs approximately 5s before Sec1-mNG peak. Aligned by moment of peak Sec1 intensity. I) Timeline of events from secretory vesicle formation to plasma membrane fusion. Timing of appearance and disappearance of proteins in this timeline is based on the individual component data (where available) and aligned with the dual component imaging data.

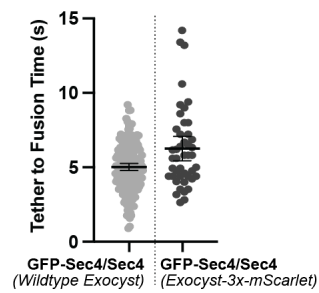

Figure 6 Supplement 1: Tether-to-fusion timing of GFP-Sec4 in Exocyst-3x-mScarlet diploid cells.

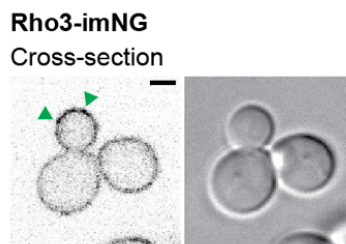

Figure 6 Supplement 2: Example of Rho3-imNG on its own in a haploid cell. Arrowheads indicate transient patches/puncta of increased Rho3 intensity.

363           When Sro7-mNG was imaged alongside Exocyst-3x-mScarlet, Sro7 signal peaked  
364 between three and four seconds after tethering (Figure 6E). While Sro7 signal appears to  
365 plateau and remain longer than expected in this context when compared to imaging of  
366 Sro7 alone (*see* Figure 5D), this is likely an artifact of variable Sro7 arrival time.  
367 Regardless, it is evident that Sro7 localizes to sites of exocytic vesicles about 2s after  
368 tethering and leaves around the moment of fusion. Interestingly, while Sro7 almost  
369 always co-localized with clear exocyst puncta in still images (as expected by the timing  
370 of its arrival relative to tethering), approximately 20% of Sro7-mNG puncta did not  
371 colocalize (Figure 6F). Although its not clear what these Sro7-only puncta represent, it's  
372 possible that there is simply an undetectable quantity of exocyst complexes residing on  
373 the associated vesicle. Alternatively, these may represent the remnants of aborted  
374 tethering events, or more intriguingly, events with a class of vesicle more highly  
375 dependent on Sro7 for fusion, such as the ones suggested might contain proteins  
376 required for salt-stress tolerance (Forsmark et al., 2011).

377           Alignment of several Sec1 puncta co-imaged with Exocyst-3x-mScarlet showed  
378 that peak Sec1 intensity corresponded with the moment of exocyst loss, the expected  
379 moment of vesicle fusion (Figure 6G). When the timing of this Sec1-mNG peak was  
380 compared to Smy1-mScarlet, we found that Smy1 arrived and began decreasing in  
381 intensity (like Myo2 in Figure 6B) approximately 5s before Sec1 peak, indirectly  
382 illustrating the time between vesicle arrival and fusion (Figure 6H).

383           Together, we can generate a timeline of events from initial secretory vesicle  
384 arrival and tethering to terminal fusion with the plasma-membrane (Figure 6I). The data  
385 paint a picture where secretory vesicles are delivered to the bud tip along actin cables  
386 and tethering is aided by the directive force of Myo2 as loss of actin cables extends  
387 tethering time. Shortly after arrival, the Sec4 GEF, Sec2, dissociates from the vesicle,  
388 followed closely by release of Myo2 and its cofactor Smy1. During this period, Rho3 on  
389 the plasma-membrane begins to associate with the tethered vesicle, likely enforcing  
390 tethering through its interactions with exocyst (Adamo et al., 1999; Robinson et al.,  
391 1999). Once the exocyst is activated and adopts an "open" conformation thanks to  
392 interactions with Rho proteins and the membrane itself (Rossi et al., 2020), Sro7 is  
393 recruited to the putative site of exocytosis by interactions with newly unoccupied  
394 Sec4:GTP molecules on the vesicle and the exocyst itself. Finally, with the chaperoned  
395 recruitment of Sec9 by Sro7, Sec1/Mso1 begins to concentrate around the vesicle, aided

396 by direct interactions with Sec6 of the exocyst (Morgera et al., 2012). Sec1 then templates  
397 and stabilizes trans-SNARE complex assembly before rapid fusion, dissociation of the  
398 exocyst, and eventual extraction of Sec4 from the plasma membrane.

399

#### 400 **Tether to fusion time is remarkably robust**

401 With a newly defined timing from secretory vesicle tethering to fusion, we  
402 wished to identify which components regulated this timing by examining how the  
403 reduction or over-expression of various components affected tethering time. To  
404 accomplish this, individual components were either overexpressed via multicopy  $2\mu$   
405 plasmids or deleted from the genome (heterozygously for essential proteins,  
406 homozygously for nonessential). Surprisingly, limitation or overexpression of few  
407 proteins appeared to significantly alter vesicle tether-to-fusion time.

408 The mechanics of vesicle fusion is driven by the SNARE proteins, schematically  
409 shown in Figure 7A, so we first examined the effect of varying their levels on tethering  
410 time. Loss of the plasma membrane SNAREs Sso2 or heterozygous reduction in the  
411 functionally redundant Sso1, resulted in a longer tethering time, as did the  
412 heterozygous reduction of Sec9. Heterozygous reduction in the vesicle SNARE Snc2,  
413 which is functionally redundant with Snc1, had little effect (homozygous loss of Snc2  
414 results in vesicle accumulation which precluded measurement of tethering time). While  
415 SNARE limitation had a clear detrimental effect on tether-to-fusion time, over-  
416 expression of either Snc2, Sec9 or Sso2 had a consistently minor, but not significant,  
417 effect of lowering tether-to-fusion time (Figure 7B). Thus, the role of SNAREs appears to  
418 be largely regulated by mass action, with their wildtype levels in modest excess.

419 Next, we examined proteins that regulate the level of active Sec4, the vesicle-  
420 bound Rab GEF Sec2, and the plasma membrane bound Rab GAP Msb3. While Msb3  
421 deletion was shown to elongate vesicle tethering time (*see* Figure 4A), its overexpression  
422 had no such clear effect. Neither did overexpression nor heterozygous reduction of Sec2  
423 (Figure 7C). It is surprising that over-expression of Sec2, which should elevate Sec4:GTP  
424 on vesicles, has no effect on tethering, whereas loss of Msb3 (*msb3 $\Delta$ /msb3 $\Delta$* ), that should  
425 also elevate Sec4:GTP, elongates tethering. To see where in the time-line this extension  
426 of tethering occurred, we examined the duration of individual components in  
427 *msb3 $\Delta$ /msb3 $\Delta$*  cells compared with wildtype. This reveals that the rapid release of Sec2  
428 from secretory vesicles after tethering is unchanged, whereas loss of Myo2 and the



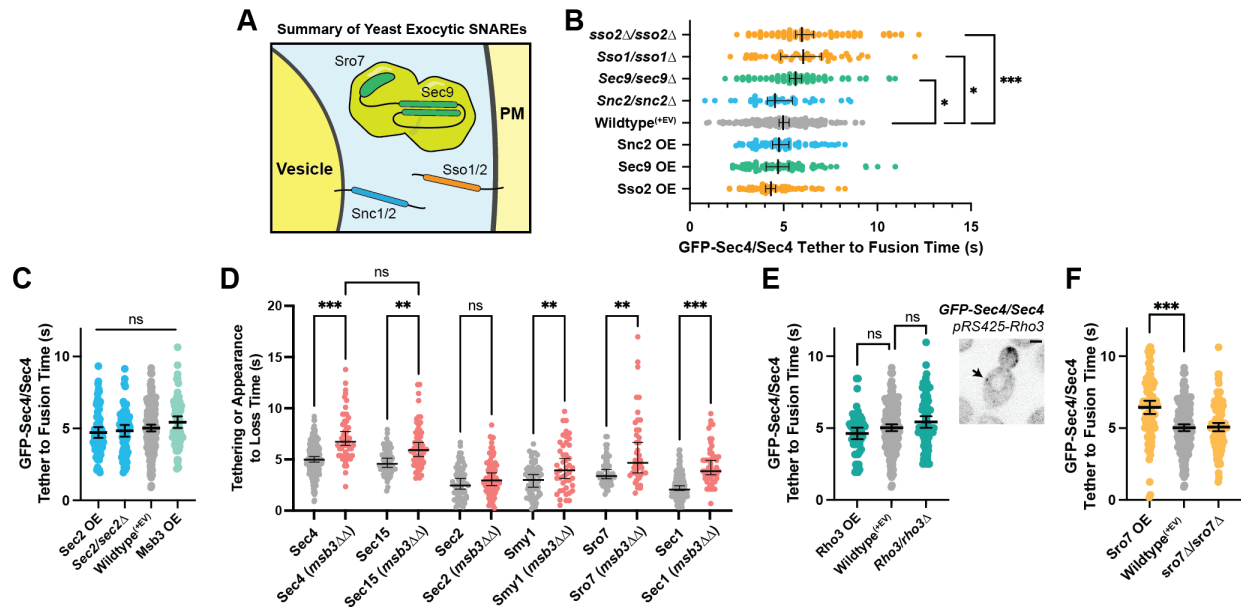

**Figure 7: Secretion is remarkably robust** A) Expanded summary diagram of exocytic SNARE localization. The cytosolic SNARE Sec9 is shown bound to Sro7. B) SNARE limitation significantly elongates vesicle tether-to-fusion time, while overexpression has the minimal, but statistically insignificant effect of decreasing tether-to-fusion time. Median  $\pm$ 95%CI. C) Overexpression of Sec2, Msb3 (or heterozygous deletion of Sec2) has no significant effect on secretory vesicle tether-to-fusion time. Mean  $\pm$ 95%CI. D) In *msb3* $\Delta\Delta$  *msb4* $\Delta$  diploid cells, all components measured, except Sec2, remain significantly longer on tethered vesicles/plasma-membrane. All but Sec4 were homozygously tagged with mNG. Median  $\pm$ 95%CI. E) Overexpression or heterozygous deletion of Rho3 has no significant effect on secretory vesicle tether-to-fusion time in the bud, however, aberrant, longer lived vesicle tethering events could be found in the mother cell when Rho3 was overexpressed. Mean  $\pm$ 95%CI. F) Overexpression of Sro7 significantly elongates vesicle tether-to-fusion time. Mean  $\pm$ 95%CI. All panels: Wildtype<sup>(+EV)</sup> shown for visual clarity. All overexpressions were compared to a relevant empty vector control, while deletions were compared the prior wildtype vesicle tethering data. See Figure 7 Supplement 1 for complete data and methods for more details. \*,  $p \leq 0.05$ ; \*\*,  $p \leq 0.005$ ; \*\*\*,  $p \leq 0.001$ .

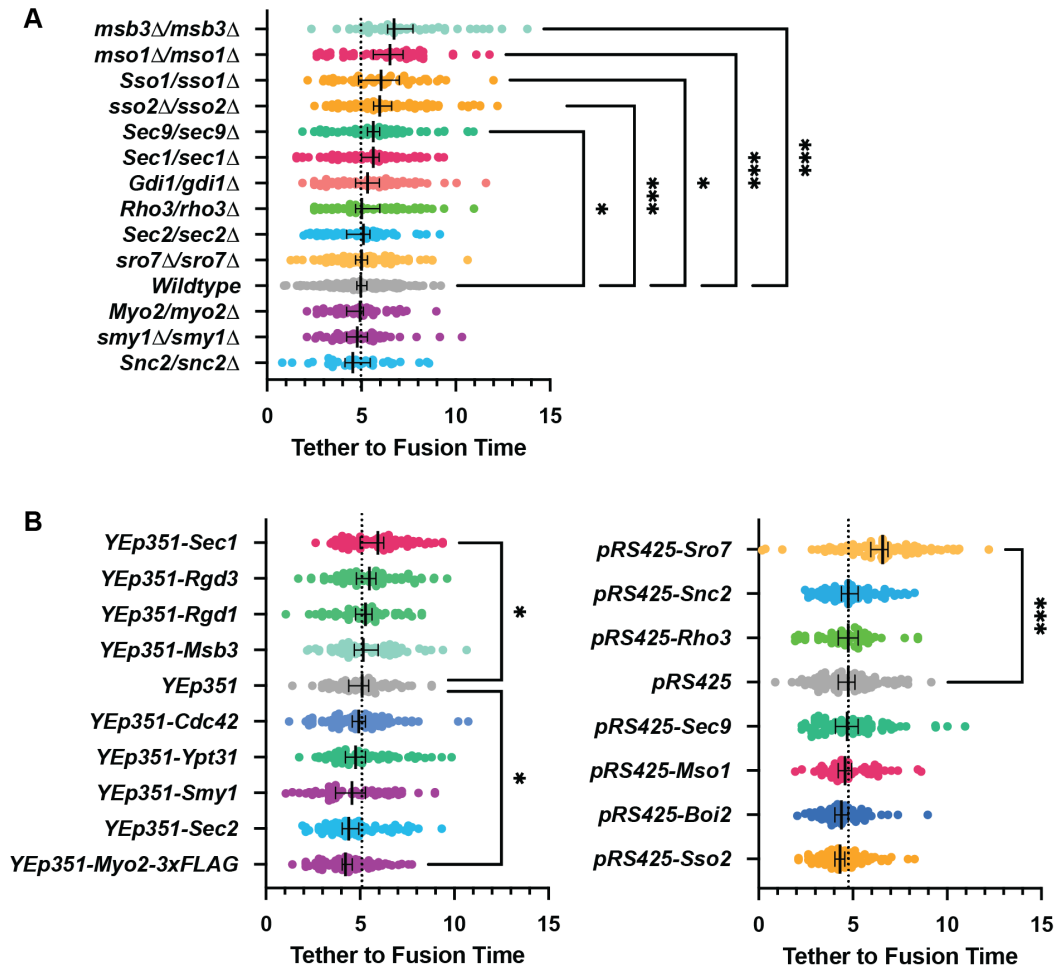

Figure 7 Supplement 1: All GFP-Sec4/Sec4 vesicle tether-to-fusion times; deletions and over expression comparisons and controls. All  $n \geq 50$  events, analyzed blind. To minimize the number of comparisons performed, these data were tested for differences among the shown groups via Kruskal-Wallis tests and then corrected post-hoc tests were performed comparing each experimental condition to the indicated control. Only significant results are indicated. All Median  $\pm 95\%$  CI. Dotted vertical line from each Wildtype/control shown. See methods for additional details. \*,  $p \leq 0.05$ ; \*\*,  $p \leq 0.005$ ; \*\*\*,  $p \leq 0.001$ .

429 exocyst is delayed and the duration of Sro7 and Sec1 is extended (Figure 7D). Thus  
430 reducing the hydrolysis rate of Sec4:GTP is uncoupled from the release of Sec2, but  
431 affects all downstream events.

432 Rho3, which likely plays an important role in the initial establishment of  
433 tethering, also had no significant effect on tether-to-fusion time when either  
434 overexpressed or heterozygously deleted (Figure 7E). Despite this, when *Rho3* was  
435 overexpressed ectopic vesicle tethering could occasionally be observed within the  
436 mother (Figure 7E, inset), though these tethering events were largely non-productive.  
437 Consistent with its non-essentiality, deletion of both copies of Sro7 showed no  
438 significant effect on vesicle tethering time (Figure 7F), whereas overexpression of Sro7  
439 via a 2 $\mu$  plasmid, resulted in a significant elongation of vesicle tethering time. This is  
440 best explained as an effect caused by diluting Sec9 at the tethered vesicle, as  
441 heterozygous deletion of Sec9 also resulted in a significant increase in tethering time  
442 (Figure 7B). Since there are relatively few Sec9 molecules in the cell, a gross  
443 overabundance of Sro7 (from overexpression) results in Sro7 being recruited to vesicles  
444 without bringing along the SNARE it's responsible for chaperoning (Hattendorf et al.,  
445 2007; Lehman et al., 1999; Watson et al., 2015).

446 Overexpression of another key Rho protein, Cdc42, as well as other regulatory  
447 components also had no significant effect on tethering time (Figure 7 Supplement 1B,  
448 C). Notably, under the stringent statistical tests required for the many comparisons  
449 made in this study, the only protein for which overexpression resulted in a statistically  
450 significant lower vesicle tether-to-fusion time was Myo2. Together with the observation  
451 that loss of actin cables lengthens tethering times (Figure 3C), this result suggests that F-  
452 actin and Myo2 participate in the establishment of productive tethering (Figure 7  
453 Supplement 1B).

454

#### 455 **Mso1 works with Sec1 to aid Sec1 localization and facilitate efficient exocytosis**

456 Overexpression of Sec1 resulted in a slightly elongated tether-to-fusion time  
457 (Figure 8A). The underlying mechanism of this increase may be similar to that of the  
458 response to Sro7 overexpression: Sec1 has little to no affinity for single SNAREs and  
459 binary SNARE complexes under normal conditions, but excess Sec1 may stabilize non-  
460 productive Sec1-SNARE complexes (Carr et al., 1999; Hashizume et al., 2009; Tognieri et  
461 al., 2006). Heterozygous deletion of Sec1 had no clear effect on tether-to-fusion time.

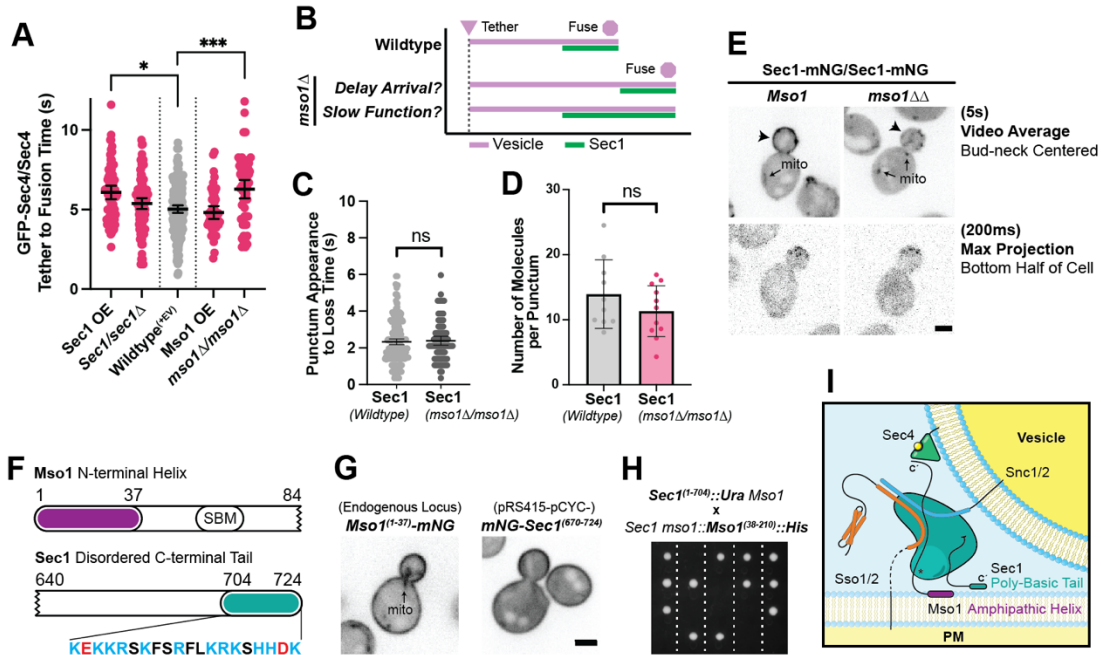

**Figure 8: Sec1 and Mso1 both contribute to Sec1 membrane recruitment and function** A) Sec1 overexpression and deletion of *mso1* significantly elongate vesicle tether-to-fusion time, while heterozygous deletion of Sec1 has little effect. \*,  $p \leq 0.05$ ; \*\*\*,  $p \leq 0.001$ . B) Two potential models for elongation of vesicle tethering induced by loss of *mso1*. Mean  $\pm$  95% CI. C) Sec1-mNG puncta have similar longevity to wildtype in *mso1* $\Delta$  cells. Mean  $\pm$  SD. D) The number of Sec1 molecules per membrane punctum is unchanged in *mso1* $\Delta$  cells. E) Broad plasma-membrane association of Sec1 is diminished in mid-sized *mso1* $\Delta$  cells. F) Schematic diagram of Mso1 N-terminal amphipathic helix and Sec1-Binding Motif (SBM) and the sequence of a portion of the Sec1 C-terminal tail. G) The amphipathic alpha-helical N-terminus of Mso1 (aa1-37) and the C-terminus of Sec1 (aa670-724) both aid in plasma membrane localization. H) Tetrad dissections show that loss of both the Mso1 N-terminus (aa1-37) and the last 20 residues of the Sec1 C-terminus is synthetically lethal. Five representative dissections are shown. See Figure 8 Supplement 1 for controls. I) With initial localization aid via Mso1, Sec1 templates the assembly of trans-SNARE complexes. A theoretical, but likely, intermediate state with Sec1 simultaneously bound to Sso1/2 and Snc1/2 is shown (Baker et al., 2015). Mso1's N-terminus binds to the plasma membrane and interacts with Sec1 through its Sec1-binding motif (\*) while Sec1 also interacts directly with the plasma membrane through its poly-basic tail. Loss of both of these PM-binding motifs is lethal. Mso1 may also contribute through reported interactions with the SNAREs and its C-terminus (C') may interact with Sec4 to aid in recruitment of the complex to tethered vesicles (Weber et al., 2010; Weber-Boyvatt et al., 2011).

462 Unsurprisingly, overexpression of the nonessential Mso1 protein also had no  
463 measurable effect, however, a strain lacking this same protein exhibited one of the  
464 largest observed increases in tether-to-fusion time (Figure 8A).

465 As Mso1 forms a tight complex with Sec1 to aid Sec1 in SNARE assembly, we  
466 considered two models for how the loss of Mso1 could affect Sec1 and, in turn, vesicle  
467 fusion (Figure 8B). In one scenario, loss of Mso1 may delay the arrival of Sec1 to the  
468 tethered vesicle but, once recruited, Sec1 may take the same amount of time to perform  
469 its essential functions. In the second scenario, if Mso1 participates in Sec1's essential  
470 function, its absence could cause Sec1 to be prolonged at the tethered vesicle, thereby  
471 delaying fusion. A defining feature of these two models is the longevity of Sec1 puncta  
472 on the plasma membrane. When we examined the longevity of Sec1-mNG in an *mso1*  
473 null, we saw no such change in the time from Sec1 punctum appearance to  
474 disappearance (Figure 8C). Nor were there any apparent changes in the number of Sec1  
475 molecules per punctum in the *mso1* null strain (Figure 8D). We did, however, find that  
476 broad plasma membrane localization of Sec1 (outside of discrete puncta) was  
477 diminished in the *mso1* $\Delta$  strain, especially for cells with midsized buds, in which vesicle  
478 tethering times were normally measured (Figure 8E).

479 These data suggest that Mso1's primary function may be to increase the local  
480 concentration of Sec1 on the plasma membrane near sites of polarized growth,  
481 hastening its ultimate recruitment to a tethered vesicle thereby promoting efficient  
482 secretory vesicle fusion. This is supported by new observations concerning Sec1  
483 membrane recruitment. Sec1 has a positively charged C-terminus, and Mso1 has an  
484 amphipathic N-terminus (Figure 8F), either of which when visualized independently  
485 localize broadly to the plasma membrane (Figure 8G). Individual loss of either of these  
486 regions from Sec1 or Mso1, can be tolerated, but simultaneous loss of these two  
487 membrane associating regions is lethal (Figure 8H and Figure 8 Supplement 1). It is  
488 interesting to note that both the extended Sec1 tail and the Mso1 protein are features  
489 unique to yeasts, and all fungal Sec1 C-termini appear to contain this highly positively  
490 charged sequence, though the length of the preceding linker region varies (Figure 8  
491 Supplement 2).

492

493

494

| Diploid Genotype                                                                         | Tetrads Analyzed | Surviving Spores |     |     |
|------------------------------------------------------------------------------------------|------------------|------------------|-----|-----|
|                                                                                          |                  | 4/4              | 3/4 | 2/4 |
| <i>Sec1/Sec1 Mso1/mso1</i> $\Delta$                                                      | 11               | 11               | 0   | 0   |
| <i>Sec1/Sec1<sup>(1-704)</sup> Mso1/mso1</i> $\Delta$                                    | 8                | 0                | 5   | 3   |
| <i>Sec1/Sec1 Mso1/mso1</i> $\Delta$ :: <i>Mso1</i>                                       | 8                | 8                | 0   | 0   |
| <i>Sec1/Sec1<sup>(1-704)</sup> Mso1/mso1</i> $\Delta$ :: <i>Mso1</i>                     | 8                | 8                | 0   | 0   |
| <i>Sec1/Sec1 Mso1/mso1</i> $\Delta$ :: <i>Mso1</i> <sup>(38-210)</sup>                   | 9                | 9                | 0   | 0   |
| <i>Sec1/Sec1<sup>(1-704)</sup> Mso1/mso1</i> $\Delta$ :: <i>Mso1</i> <sup>(38-210)</sup> | 15               | 1                | 10  | 4   |

Figure 8 Supplement 1: Controls and complete results for *Sec1* truncation and replacement of *mso1* for tetrad dissection experiments.

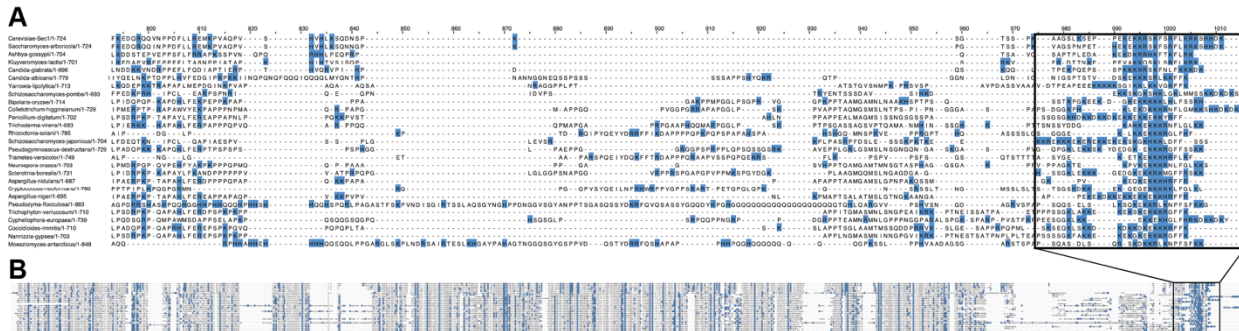

Figure 8 Supplement 2: Alignment of many fungal *Sec1* tails. A) Positively charged residues (blue) in the region of the *Sec1*-tail and B) in the context of the entire alignment.

495 **Discussion**

496           Since many of the components of the yeast secretory pathway were first  
497 described in the 1980's, attempts to further characterize the proteins have relied  
498 primarily on genetic and biochemical dissection of interactions to order the events  
499 leading to vesicle fusion at the plasma membrane. The dense and fast-growing nature of  
500 the yeast bud, however, has largely prevented direct visualization of secretory  
501 components of single exocytic events. Given the large number of secretory vesicles that  
502 are necessarily transported into the bud per minute to maintain growth and counteract  
503 the internalization of membrane from endocytosis (which primarily occurs within the  
504 bud), resolving individual vesicles is challenging.

505           At any point, there may be near two dozen secretory vesicles in a growing bud  
506 and when this is considered alongside the speed at which vesicles are capable of  
507 moving via Myo2 (Schott et al., 2002)—an average of  $3\mu/s$ —and the diffraction-limited  
508 resolution of conventional microscopy, sufficiently fast capture time can be the  
509 difference between observing stationary tethered vesicles and a blurred mass of signal.  
510 For the best spatiotemporal resolution, we opted to use high-speed spinning disk-  
511 confocal microscopy with short exposures and high excitation energies to image  
512 exocytic events over short time windows (30s-1m). Imaging only the half of the bud  
513 closest to the coverslip also simplified the task of visualization. Analysis of all single-  
514 fluorophore microscopy was performed by viewing videos in 3D, as opposed to simple  
515 max or sum projections and this technique was invaluable for the ability to track  
516 individual vesicles through space, define tethering events with high confidence, and  
517 rule out abortive tethering events. Super-resolution microscopy techniques, while  
518 desirable for the increased spatial resolution, are yet unable to capture these such events  
519 with sufficient temporal resolution.

520           When possible and when they did not appear to compromise function or  
521 localization, we used the brightest yeast codon-optimized and monomeric fluorescent  
522 proteins currently available: mNeonGreen and mScarlet (Bindels et al., 2017; Lambert,  
523 2019; Shaner et al., 2013). Furthermore, all proteins were tagged directly in the genome  
524 under the expression of their own promoters, despite this severely restricting the  
525 number of molecules available to image. In part due to this imposed limitation,  
526 correlative imaging of any combination of two proteins with separate fluorescent tags

527 became an even more complicated task. Under ideal conditions (excitation laser  $\lambda$ ,  
528 emission filter  $\lambda$ , equal camera sensitivity) mScarlet is still roughly 75% as bright as  
529 mNeonGreen and, in our hands, mScarlet fusion proteins were generally less well-  
530 behaved. Tagged mScarlet-Sec4 did not even appear as bright as GFP-Sec4, perhaps  
531 owing to mScarlet's much longer fluorescence maturation time (Lambert, 2019). For  
532 these reasons, very few protein pairs were possible to image while maintaining  
533 reasonable temporal resolution.

534         During the formation of secretory vesicles at Ypt31-marked TGN compartments,  
535 Sec2 precedes Sec4 arrival by about a second, while Myo2 is recruited to the  
536 compartment shortly after Sec4. Additionally, while Myo2 appears capable of localizing  
537 to these compartments ahead of vesicle separation from the TGN, the force generated  
538 by Myo2 transport does not appear to be necessary for vesicle formation, as this process  
539 continues in the absence of actin cables. We have also found that the entire exocyst  
540 complex (including Sec3) localizes to secretory vesicles during transport to the bud and  
541 remains associated with the vesicle throughout tethering, only disassociating near the  
542 moment of fusion. While this does not necessarily rule out the presence of a population  
543 of Sec3 that localizes to the plasma membrane independently, the vesicular localization  
544 and the FLIP data appear to support a model where the yeast exocyst is an obligate  
545 hetero-octamer (Heider et al., 2016).

546         In this study, secretory vesicles were found to tether for about five seconds  
547 before fusion with the plasma membrane; a far shorter time than previously believed.  
548 Prior work had indicated a "long" tether-to-fusion time for vesicles on the order of 15-  
549 18 seconds (Alfaro et al., 2011; Donovan and Bretscher, 2015b). However, it now seems  
550 far more likely that such results are artefacts of slow imaging speed and the presence of  
551 vesicle tethering hot-spots. These hot-spots are likely biologically favorable for the  
552 maintenance of efficient and productive vesicle fusion. Sequential and/or simultaneous  
553 tethering events would logically permit utilization of the same pool of cofactors  
554 responsible for the initiation of tethering and downstream events preceding fusion.

555         Sec2, Smy1, and Myo2 all dissociate from secretory vesicles shortly after  
556 tethering, though release occurs at different rates and is not a concerted event. In future  
557 studies, it will be interesting to see how displacement of Sec2 affects release of other  
558 components and timing of overall vesicle tethering as a whole. Since deletion of the



559 Sec4 GAP Msb3 elongates the vesicle residence time of every component measured  
560 except Sec2, it appears that Sec2 release is controlled by a Sec4-independent process,  
561 perhaps dephosphorylation by an as yet unknown bud-resident phosphatase, a  
562 regulatory mode previously suggested (Stalder et al., 2013; Stalder and Novick, 2016).  
563 Further, since GAP function necessarily requires binding to the same face of the Rab  
564 recognized by most effectors (Pan et al., 2006), a direct competition is implied since  
565 Msb3 cannot simply “kick off” Myo2 and others bound to Sec4 at the plasma membrane  
566 by stimulating Sec4-GTP hydrolysis allosterically. Thus, exactly how Msb3 function and  
567 Sec4:GTP state are coupled to tethering time needs to be explored further.

568         Loss of Msb3 elongates the tethering time by acting on tethered vesicles prior to  
569 fusion. Although loss of Msb3 also results in accumulation of Sec4 in the plasma  
570 membrane, we have shown that this is not the cause of elongated tethering. If we take  
571 as axiom that Sec4:GDP readily binds new GTP without the aid of its GEF Sec2  
572 (Kabcenell et al., 1990; Rinaldi et al., 2015; Walch-Solimena et al., 1997), then some  
573 portion of Sec4 delivered to the plasma membrane through fusion is likely to be  
574 Sec4:GTP, preventing extraction by GDI (Guanine-nucleotide Dissociation Inhibitor).  
575 Therefore, Msb3 acts on Sec4 “twice”, once on the vesicle pre-fusion and once on the  
576 plasma membrane post-fusion. We believe this to be the simplest explanation of the  
577 observed data. Since hydrolysis of Sec4:GTP is not strictly essential for exocytosis  
578 (*Sec4<sup>Q79L</sup>* haploids are viable), one interpretation is that the action of Msb3 on vesicle-  
579 bound Sec4 aids in the facilitated release or swapping of Sec4 effectors.

580         The unexpected difference between the effects of two conditions which, in  
581 principle, both increase relative Sec4:GTP abundance (Sec2 overexpression and loss of  
582 Msb3) highlights the spatiotemporal regulation and robustness of secretion. Whereas  
583 deletion of plasma membrane localized Msb3 shifts the Sec4 equilibrium towards the  
584 GTP-bound state in the context of tethered vesicles, overexpression of Sec2 shifts the  
585 GTP equilibrium in the context of vesicle formation and transport. The early presence of  
586 Sec2 and the maintenance of Sec4:GTP during transportation to the bud tip directly aids  
587 in the recruitment of crucial effectors like Myo2 and the exocyst. Such Sec4:GTP  
588 maintenance is unfavorable in the context of a tethered vesicle, perhaps due to the  
589 exchange of Sec4 effectors near the plasma membrane. Correspondingly, when we look  
590 at the timing of individual components in the context of an *msb3ΔΔ*, we can see that the  
591 rapid release of Sec2 from secretory vesicles after reaching the bud tip is uncoupled

592 from the downstream events preceding vesicle fusion, as it is the only component for  
593 which there is no significant change.

594 By combining the rapid three-dimensional capture and analysis of individual  
595 components with fast 2D dual-color microscopy we were next able to align several  
596 events which occur before fusion vesicle fusion to generate a timeline from tethering to  
597 fusion. Strains with multiple subunits of the exocyst tagged with mScarlet proved to be  
598 the most useful tool for alignment of these exocytic events. This set of three tags  
599 (comprised of fusions with Sec10, Sec15, and Exo84) localizes well and appeared to  
600 behave fine when combined with most other fusions, only moderately affecting timing  
601 of various events.

602 While Rho1 and Cdc42 are capable of interacting with the exocyst through the N-  
603 terminal PH-like domain of Sec3, Rho3 is of particular interest due to its ability to bind  
604 the exocyst through Exo70, a subunit which appears to be involved in the activation of  
605 the exocyst (Robinson et al., 1999; Rossi et al., 2020; Wu et al., 2009). Previous studies  
606 have shown that gain of function mutants in Exo70 are capable of suppressing loss of  
607 Rho3 and that the same gain of function mutations cause the exocyst to shift into a  
608 partially open 'active' conformation which exposes new binding sites. We previously  
609 showed that Rho3 primarily localizes to the plasma membrane, and not on internal  
610 vesicles, with concentration on the membrane increasing toward the bud tip and  
611 transient discrete puncta of yet higher concentration (Gingras et al., 2020). Imaging of  
612 Exocyst-3x-mScarlet with endogenous expression of this previously developed Rho3-  
613 imNG showed that Rho3 initially concentrates in puncta at vesicles shortly following  
614 their arrival to the plasma membrane. Together, a plausible model suggests that  
615 diffusing Rho3 on the plasma membrane is slowed down through interaction with  
616 Exo70, resulting in an apparent local accumulation, after which the interaction induces a  
617 conformational change in the exocyst, potentially to facilitate the binding of SNAREs  
618 and other exocytic proteins.

619 Subsequent to this, Sro7, a homolog of the *lethal giant larvae* and tomosyn polarity  
620 protein, is recruited to the exocytic site. As Sro7 primarily interacts with the exocyst  
621 through the exposed and labile N-terminus of Exo84 (Mei et al., 2018; Rossi et al., 2014;  
622 Zhang et al., 2005), it seems unlikely that the aforementioned conformational change is  
623 responsible for triggering binding of Sro7. Rather, it seems possible that loss of Sec2 and  
624 Myo2 from the vesicle frees a population of active vesicular Sec4 which then binds Sro7

625 as a new effector, consistent with timing of Sro7 accumulation (Rossi et al., 2018;  
626 Watson et al., 2015). How Msb3 plays a role in this transition is unclear, however, a  
627 direct role seems likely based on the increase in Sro7 punctum longevity observed in  
628 *msb3* null cells. Interestingly, despite Sro7 localizing to sites of exocytic vesicles mid-  
629 tether, some 20% of Sro7-mNG puncta appeared to lack clear exocyst colocalization.  
630 Sro7 has been claimed to function in parallel to the exocyst, and overexpression can  
631 bypass loss of certain exocyst components, so it's possible that these puncta represent a  
632 separate class of vesicle of uncertain identity which remains more dependent on Sro7  
633 function (Grosshans et al., 2006; Lehman et al., 1999).

634 While tethering, as facilitated by the exocyst complex, is the first and more  
635 reversible step towards vesicle fusion, docking, which is thought to be facilitated by  
636 SNARE-assembly, is likely more stable. SNARE proteins are not capable of stimulating  
637 membrane fusion on their own *in vivo*, instead requiring the aid of additional factors  
638 called Sec1-Munc18 (SM) proteins (Baker and Hughson, 2016; Hong and Lev, 2014).  
639 Though it was not directly imaged, the SNARE Sec9, Sro7, and Sec4:GTP have been  
640 shown to form a ternary complex, so the arrival of Sro7 at the tethered vesicle likely  
641 indicates the arrival of Sec9 (Grosshans et al., 2006). The local recruitment of Sec9  
642 thereby increases the likelihood of forming binary and ternary SNARE-pin  
643 intermediates capable of binding Sec1, as Sec1 has been shown to have essentially no  
644 interaction with SNARE monomers but is essential for exocytosis and viability (Carr et  
645 al., 1999; Tognneri et al., 2006). Crystallographic studies of the vacuolar SM protein  
646 Vps33 suggest that SM proteins function as templates of SNARE assembly (Baker et al.,  
647 2015, 2013). Earlier studies, however, have shown that Sec1 has distinct functions both  
648 before and after 'docking', where docking is defined as SNARE-pin assembly  
649 (Hashizume et al., 2009). Additionally, early studies of the neuronal Sec1 in rats  
650 (Munc18) and *Drosophila* (Rop) suggested that SM proteins may have a negative-  
651 regulatory role in exocytic regulation (Halachmi and Lev, 1996; Schulze et al., 1994;  
652 Zhang et al., 2000).

653 This study contains the first direct *in vivo* visualization of SM proteins with  
654 sufficient spatiotemporal resolution to identify localization to single exocytic vesicles.  
655 The data presented here on the timing and dynamics of Sec1 function in yeast, support  
656 a model where SM proteins accumulate at pre-fusion membranes helping to facilitate  
657 SNARE assembly, holding in place briefly before concerted release, and thereby,

658 membrane fusion. It is easy to imagine why it would be beneficial for SM proteins to  
659 remain associated with assembled SNARE-pins, as its presence should prevent the  
660 unwanted disassembly of otherwise productive trans-SNARE complexes by NSF and  $\alpha$ -  
661 SNAP, Sec18 and Sec17, respectively, in yeast (Jun and Wickner, 2019; Song et al., 2017).  
662 Sec1 is aided in initial plasma membrane localization by the small fungal-specific  
663 peripheral plasma membrane protein, Mso1, and that this initial membrane recruitment  
664 represents a shared essential function of Mso1 and the (also fungal-only) Sec1 C-  
665 terminus. In higher eukaryotes, this initial localization is instead accomplished through  
666 a direct interaction between the exocytic SM protein and an N-terminal peptide on the  
667 Syntaxin-homologs (which is not found in the yeast Sso1/2 syntaxins)(Hu et al., 2007;  
668 Rathore et al., 2010).

669 Our timeline and relative abundance of participating components involved in the  
670 biogenesis of secretory vesicles at the Golgi and their exocytosis at the plasma membrane  
671 raise many questions. Notably, the exact mechanism of secretory vesicle biogenesis is  
672 still shrouded in mystery. Previous searches for proteins responsible for secretory  
673 vesicle biogenesis have relied on the assumption that if secretion itself is essential, the  
674 formation of secretory vesicles must also be essential. Additionally, previous studies  
675 have suggested the existence of multiple secretory pathways, a model which is  
676 supported by some observations in this study. Though we did not uncover any clear  
677 evidence of differentially regulated tethering and fusion events, future studies (perhaps  
678 utilizing cargo-specific markers) may still find subtle but physiologically significant  
679 differences in the regulation of vesicle subpopulations. The solutions of these mysteries,  
680 as well as mechanistic and structural studies on how the conformational transition of  
681 the exocyst facilitates the shift from tethering to docking in fusion are all questions that  
682 can build on the framework presented here.

683

## 684 **Materials and Methods**

685

### 686 *Yeast strains, growth, and transformation*

687 Yeast strains used in this study are listed in Table 1. Standard media and techniques for  
688 yeast growing and transformation were used. Gene deletion and C-terminal  
689 chromosomal tagging was performed using common PCR-mediated techniques  
690 (Longtine et al., 1998). Tetrad dissections were performed using an MSM-400 dissection  
691 scope (Singer Instruments, Somerset, United Kingdom) with 25 $\mu$ m needle following a  
692 one-week incubation at 26°C in standard sporulation media (1% yeast extract, 1%  
693 potassium acetate, and 0.05% glucose).

694

### 695 *DNA constructs*

696 Plasmids used in this study are listed in Table 2. The integrating plasmid pRS306-GFP-  
697 Sec4 used to tag Sec4 has been previously described (Donovan and Bretscher, 2012). The  
698 Rho3-imNG constructs as well as the yeast codon optimized mScarlet were described  
699 previously (Gingras et al., 2020). N-terminal tags of Ypt31 and Ypt32 were amplified  
700 from plasmids containing a selectable marker, relevant promoter, and associated tag via  
701 oligos containing additional homology and then integrated via transformation. For  
702 construction of pRS415-pCYC100-Tomato-mouseCC-Myo2(Cargo Binding Domain)-  
703 tCYC, first a stretch of 156 residues of the coiled-coil region of Mouse Myosin 5b was  
704 synthesized by IDT (Coralville, Iowa). For ease of cloning, the full length Myo2  
705 sequence was restriction cloned into pRS415-pCYC100-(MCS)-tCYC. After amplification  
706 of the first Tomato from tdTomato, the Tomato, mouseCC, and amplified backbone plus  
707 Myo2-CBD were assembled via Gibson assembly. This was later cloned into pRS303  
708 with mNG for genomic insertion into the *His3* locus. All plasmid and oligonucleotide  
709 sequences used are available upon request.

710

### 711 *Construction of Exocyst-3x-mNG/mScarlet Strains*

712 Haploid cells containing C-terminal endogenously tagged *Exo84-mNG::Ura3* and *Sec15-*  
713 *mNG::Ura3* were mated and sporulated to obtain a strain with both tags. The *Exo84-*  
714 *mNG::Ura3 Sec15-mNG::Ura3* haploid was then mated with *Sec10-mNG::Ura3* and  
715 sporulated to obtain a strain with all three tags. A guide RNA was created to target the  
716 *mNG* sequence 20 bps from the linker region with BpII cut sites at both 5' and 3' ends.  
717 After ligating the gDNA oligos, the guide was digested with BpII and cloned into the  
718 CRISPR-Cas9 vector bRA90 which expressed this gRNA and the CRISPR machinery  
719 (Anand et al., 2017). A separate repair *mScarlet::NatMX* was made with 40bps  
720 homologous sequences to the linker region and the beginning of *mNG* and the last  
721 40bps of homology to *Ura3*. The bRA90 vector (200ng) and the repair (1 $\mu$ g) was  
722 transformed into the *Exo84-mNG::Ura3 Sec15-mNG::Ura3 Sec10-mNG::Ura3* haploid cells.  
723 Cells were plated on NatMX -LEU MSG plates and grown at 26°C for 1 week.  
724 Transformants were screened for red fluorescence and absence of green and positive

725 clones were selected for further experiments. The bRA90 plasmid was eliminated from  
726 the cells by repeatedly plating them on NatMX plates until the LEU plasmid was lost.

727

### 728 *Microscopy techniques*

729 Most micrographs in this study were acquired on a CSU-X spinning-disk confocal  
730 microscopy system (Yokogawa, Tokyo, Japan; 3i Intelligent Imaging Innovations,  
731 Denver, Colorado) with a DMI6000B microscope (Leica Microsystems, Wetzlar,  
732 Germany), 100 × 1.45 NA objective (Leica), and an Evolve 512Delta EMCCD (Teledyne  
733 Photometrics, Tucson, Arizona) with a 2× magnifying lens (Yokogawa) for a final  
734 resolution of 0.084 $\mu\text{m}$ /pixel. A few images (Supplement 2.1 and Figure 3B) were  
735 captured instead on a Flash 4.0v2 CMOS (Hamamatsu, Hamamatsu City, Japan) with a  
736 final resolution of 0.065 $\mu\text{m}$ /pixel. For live-cell imaging, cells in mid-log phase were  
737 adhered to a glass-bottomed dish (CellVis, Mountain View, California) coated with  
738 concanavalin A (EY laboratories, San Mateo, California) and washed with the respective  
739 dropout or complete cell medium. Unless otherwise stated, imaging of single-channel  
740 fluorescence was performed via SlideBook 6.0 'Rapid 4D' capture, with sustained laser  
741 intensity, constant piezo movement, and video frames streamed to disk, with 25-50ms  
742 exposure per plane. As these videos were captured with the bottom plane of the volume  
743 coincident with the bottom of the cell, the result was a 6-plane, 1.5 $\mu\text{m}$  volume of the  
744 bud, captured with 175-333ms per time-point. For two-channel microscopy, single  
745 planes focused on the bottom or center of the cell were captured in rapid alternation  
746 with 75-100ms exposure per channel. These alternating images were later aligned for  
747 display in figures.

748

### 749 *Video and image analysis*

750 Molecule counting was performed by comparison to Cse4-mNG puncta intensity at  
751 anaphase, as described previously (Donovan and Bretscher, 2012). All timings were  
752 performed on blinded image data with file names randomized with a freely available  
753 Perl script (Salter, 2016). All blinded tethering and longevity captures were analyzed  
754 using 3D projection in SlideBook 6.0 when possible. At least 50 events (from videos  
755 captured on at least three separate days) were quantified per component or genotype.  
756 Generally, videos were played in reverse to identify events that concluded within the  
757 capture time then, once single events were confidently identified (based on lack of  
758 nearby fluorescence or component movement), the tethering start point was  
759 determined. Tethering start was defined as the first frame in which a GFP-Sec4 vesicle  
760 (or another component residing on a vesicle) came to a full stop at a location not more  
761 than one apparent vesicle diameter from where it eventually fused (or signal  
762 disappeared). Fusion (or disappearance) was defined as the last frame in which signal  
763 could be positively identified at the tethering location.

764

765 Plots of signal over time for Sro7 and Sec1 (Figure 5D and F) were generated by  
766 extracting punctum intensity of events from sum projections of the bottom half of buds

767 in FIJI (captured as in Figure 2B). After measuring the intensity over time for many  
768 puncta, several events were grouped with apparent lengths of one standard deviation  
769 of the mean longevity (of the events measured this way). These intensity profiles were  
770 then aligned manually by apparent moment of peak intensity, normalized to peak, and  
771 averaged in Prism 9 (GraphPad Software, San Diego, California). The dual channel  
772 intensity plots in Figure 6 were similarly generated, except the source videos were  
773 single plane captures (described above) and alignment of similar events was performed  
774 based on either the apparent start of tethering (for combinations with Sec4 or Exocyst)  
775 or peak Sec1 intensity.

776

#### 777 *Latrunculin B (LatB) experiment*

778 Experiments assessing the effects of actin cable loss on tethering were performed with  
779 addition of latrunculin directly to a dish containing a small volume of cells on the  
780 microscope stage to permit rapid imaging of subsequent timepoints. Briefly, 50 $\mu$ L of  
781 LatB in ethanol (Cayman Chemical, Ann Arbor, Michigan) was evaporated under  
782 nitrogen and resuspended in an equivalent volume of synthetic complete media. To  
783 facilitate rapid diffusion, 8 $\mu$ L of this resuspension was added directly to 92 $\mu$ L of cells  
784 attached to a dish as above, for a final concentration of 100 $\mu$ M LatB. Under these  
785 conditions most actin cables are lost within the first minute.

786

#### 787 *Fluorescence Loss in Photobleaching (FLIP) experiment*

788 For the FLIP experiment with Sec3 and Sec5, since individual vesicles did not need to be  
789 distinguishable GFP-fusions were chosen. FLIPs were performed essentially as done in  
790 prior studies (Donovan and Bretscher, 2015a). Briefly, using a 3i Vector photobleaching  
791 system, the back half of the mother cell was photobleached once every 2 seconds with  
792 simultaneous monitoring of bud intensity. Pre-photobleach intensity of signal within  
793 the bud was set to 1.0, with background fluorescence subtraction, and further  
794 photobleaching normalization to a nearby non-targeted cell. These measurements were  
795 later averaged and depicted  $\pm$  SD.

796

#### 797 *Statistics and Presentation*

798 Graphs and statistical analyses were generated in Prism 9. For all single component  
799 timings (compiled in Supplement 5.2), differences were first assessed via Kruskal-  
800 Wallance non-parametric ANOVA, followed by the select Dunn's corrected post-hoc  
801 tests shown. Similarly, vesicle tether-to-fusion timings in deletions and overexpressions  
802 were grouped (as shown in Supplement 7.1), with deletions being compared to the  
803 wildtype vesicle tether-to-fusion times first shown in Figure 2C, and each  
804 overexpression being compared to the relevant 2 $\mu$ m empty vector control. In this case,  
805 corrected post-hoc tests were performed between the relevant control and each  
806 experimental condition only (not between any independent overexpression or deletion  
807 conditions). Fungal Sec1 sequences were gathered from UniProt (Consortium et al.,  
808 2020), aligned via Clustal Omega (Sievers et al., 2011), and colorized with JalviewJS

809 hosted on MyHits (Pagni et al., 2007; Waterhouse et al., 2009). Figures were assembled  
810 in Illustrator (Adobe).

811

812

813 **Acknowledgements:**

814 This work was funded by NIH grants 5RO1GM039066 and 5R35GM131751.

815



816 **References**

817  
818

819 Adamo JE, Rossi G, Brennwald P. 1999. The Rho GTPase Rho3 Has a Direct Role in Exocytosis  
820 That Is Distinct from Its Role in Actin Polarity. *Mol Biol Cell* **10**:4121–4133.  
821 doi:10.1091/mbc.10.12.4121

822 Ahmed SM, Nishida-Fukuda H, Li Y, McDonald WH, Gradinaru CC, Macara IG. 2018. Exocyst  
823 dynamics during vesicle tethering and fusion. *Nat Commun* **9**:5140. doi:10.1038/s41467-018-  
824 07467-5

825 Alfaro G, Johansen J, Dighe SA, Duamel G, Kozminski KG, Beh CT. 2011. The Sterol-Binding  
826 Protein Kes1/Osh4p Is a Regulator of Polarized Exocytosis. *Traffic* **12**:1521–1536.  
827 doi:10.1111/j.1600-0854.2011.01265.x

828 Anand R, Beach A, Li K, Haber J. 2017. Rad51-mediated double-strand break repair and  
829 mismatch correction of divergent substrates. *Nature* **544**:377–380. doi:10.1038/nature22046

830 Baker RW, Hughson FM. 2016. Chaperoning SNARE assembly and disassembly. *Nat Rev Mol*  
831 *Cell Bio* **17**:465–479. doi:10.1038/nrm.2016.65

832 Baker RW, Jeffrey PD, Hughson FM. 2013. Crystal Structures of the Sec1/Munc18 (SM) Protein  
833 Vps33, Alone and Bound to the Homotypic Fusion and Vacuolar Protein Sorting (HOPS)  
834 Subunit Vps16\*. *Plos One* **8**:e67409. doi:10.1371/journal.pone.0067409

835 Baker RW, Jeffrey PD, Zick M, Phillips BP, Wickner WT, Hughson FM. 2015. A direct role for  
836 the Sec1/Munc18-family protein Vps33 as a template for SNARE assembly. *Science*  
837 **349**:1111–1114. doi:10.1126/science.aac7906

838 Bindels DS, Haarbosch L, Weeren L van, Postma M, Wiese KE, Mastop M, Aumonier S,  
839 Gotthard G, Royant A, Hink MA, Gadella TWJ. 2017. mScarlet: a bright monomeric red  
840 fluorescent protein for cellular imaging. *Nat Methods* **14**:53–56. doi:10.1038/nmeth.4074

841 Boyd C, Hughes T, Pypaert M, Novick P. 2004. Vesicles carry most exocyst subunits to exocytic  
842 sites marked by the remaining two subunits, Sec3p and Exo70p. *J Cell Biology* **167**:889–901.  
843 doi:10.1083/jcb.200408124

844 Carr CM, Grote E, Munson M, Hughson FM, Novick PJ. 1999. Sec1p Binds to SNARE  
845 Complexes and Concentrates at Sites of Secretion. *J Cell Biology* **146**:333–344.  
846 doi:10.1083/jcb.146.2.333

847 Chi RJ, Liu J, West M, Wang J, Odorizzi G, Burd CG. 2014. Fission of SNX-BAR-coated  
848 endosomal retrograde transport carriers is promoted by the dynamin-related protein Vps1. *J*  
849 *Cell Biol* **204**:793–806. doi:10.1083/jcb.201309084

- 850 Consortium TU, Bateman A, Martin M-J, Orchard S, Magrane M, Agivetova R, Ahmad S, Alpi  
851 E, Bowler-Barnett EH, Britto R, Bursteinas B, Bye-A-Jee H, Coetzee R, Cukura A, Silva AD,  
852 Denny P, Dogan T, Ebenezer T, Fan J, Castro LG, Garmiri P, Georghiou G, Gonzales L,  
853 Hatton-Ellis E, Hussein A, Ignatchenko A, Insana G, Ishtiaq R, Jokinen P, Joshi V, Jyothi D,  
854 Lock A, Lopez R, Luciani A, Luo J, Lussi Y, MacDougall A, Madeira F, Mahmoudy M,  
855 Menchi M, Mishra A, Moulang K, Nightingale A, Oliveira CS, Pundir S, Qi G, Raj S, Rice D,  
856 Lopez MR, Saidi R, Sampson J, Sawford T, Speretta E, Turner E, Tyagi N, Vasudev P,  
857 Volynkin V, Warner K, Watkins X, Zaru R, Zellner H, Bridge A, Poux S, Redaschi N, Aimo  
858 L, Argoud-Puy G, Auchincloss A, Axelsen K, Bansal P, Baratin D, Blatter M-C, Bolleman J,  
859 Boutet E, Breuza L, Casals-Casas C, Castro E de, Echioukh KC, Coudert E, Cuche B, Doche  
860 M, Dornevil D, Estreicher A, Famiglietti ML, Feuermann M, Gasteiger E, Gehant S,  
861 Gerritsen V, Gos A, Gruaz-Gumowski N, Hinz U, Hulo C, Hyka-Nouspikel N, Jungo F,  
862 Keller G, Kerhornou A, Lara V, Mercier PL, Lieberherr D, Lombardot T, Martin X, Masson  
863 P, Morgat A, Neto TB, Paesano S, Pedruzzi I, Pilbout S, Pourcel L, Pozzato M, Pruess M,  
864 Rivoire C, Sigrist C, Sonesson K, Stutz A, Sundaram S, Tognolli M, Verbregue L, Wu CH,  
865 Arighi CN, Arminski L, Chen C, Chen Y, Garavelli JS, Huang H, Laiho K, McGarvey P,  
866 Natale DA, Ross K, Vinayaka CR, Wang Q, Wang Y, Yeh L-S, Zhang J, Ruch P, Teodoro D.  
867 2020. UniProt: the universal protein knowledgebase in 2021. *Nucleic Acids Res* **49**:D480–  
868 D489. doi:10.1093/nar/gkaa1100
- 869 Day KJ, Casler JC, Glick BS. 2018. Budding Yeast Has a Minimal Endomembrane System. *Dev*  
870 *Cell* **44**:56-72.e4. doi:10.1016/j.devcel.2017.12.014
- 871 Donovan K, Bretscher A. 2015a. Head-to-tail regulation is critical for the in vivo function of  
872 myosin V. *J Cell Biology* **209**:359–65. doi:10.1083/jcb.201411010
- 873 Donovan K, Bretscher A. 2015b. Tracking individual secretory vesicles during exocytosis  
874 reveals an ordered and regulated process. *J Cell Biology* **210**:181–9.  
875 doi:10.1083/jcb.201501118
- 876 Donovan K, Bretscher A. 2012. Myosin-V Is Activated by Binding Secretory Cargo and  
877 Released in Coordination with Rab/Exocyst Function. *Dev Cell* **23**:769--781.  
878 doi:10.1016/j.devcel.2012.09.001
- 879 Finger FP, Hughes TE, Novick P. 1998. Sec3p Is a Spatial Landmark for Polarized Secretion in  
880 Budding Yeast. *Cell* **92**:559–571. doi:10.1016/s0092-8674(00)80948-4
- 881 Forsmark A, Rossi G, Wadskog I, Brennwald P, Warringer J, Adler L. 2011. Quantitative  
882 proteomics of yeast post-Golgi vesicles reveals a discriminating role for Sro7p in protein  
883 secretion. *Traffic Cph Den* **12**:740–53. doi:10.1111/j.1600-0854.2011.01186.x
- 884 Gingras RM, Lwin KM, Miller AM, Bretscher A. 2020. Yeast Rgd3 is a phospho-regulated F-  
885 BAR-containing RhoGAP involved in the regulation of Rho3 distribution and cell  
886 morphology. *Mol Biol Cell* **31**:2570–2582. doi:10.1091/mbc.e20-05-0288

- 887 Glomb O, Wu Y, Rieger L, Rüttnick D, Mulaw MA, Johnsson N. 2020. The cell polarity  
888 proteins Boi1 and Boi2 direct an actin nucleation complex to sites of exocytosis in  
889 *Saccharomyces cerevisiae*. *Journal of Cell Science* **133**:jcs237982. doi:10.1242/jcs.237982
- 890 Grosshans BL, Andreeva A, Gangar A, Niessen S, Yates JR, Brennwald P, Novick P. 2006. The  
891 yeast Igl family member Sro7p is an effector of the secretory Rab GTPase Sec4p. *J Cell*  
892 *Biology* **172**:55–66. doi:10.1083/jcb.200510016
- 893 Guo W, Roth D, Walch-Solimena C, Novick P. 1999. The exocyst is an effector for Sec4p,  
894 targeting secretory vesicles to sites of exocytosis. *Embo J* **18**:1071–1080.  
895 doi:10.1093/emboj/18.4.1071
- 896 Gurunathan S, David D, Gerst JE. 2002. Dynamin and clathrin are required for the biogenesis of  
897 a distinct class of secretory vesicles in yeast. *Embo J* **21**:602–614.  
898 doi:10.1093/emboj/21.4.602
- 899 Halachmi N, Lev Z. 1996. The Sec1 Family: A Novel Family of Proteins Involved in Synaptic  
900 Transmission and General Secretion. *J Neurochem* **66**:889–897. doi:10.1046/j.1471-  
901 4159.1996.66030889.x
- 902 Harsay E, Bretscher A. 1995. Parallel secretory pathways to the cell surface in yeast. *J Cell*  
903 *Biology* **131**:297--310. doi:10.1083/jcb.131.2.297
- 904 Harsay E, Schekman R. 2007. Avl9p, a Member of a Novel Protein Superfamily, Functions in  
905 the Late Secretory Pathway. *Mol Biol Cell* **18**:1203–1219. doi:10.1091/mbc.e06-11-1035
- 906 Hashizume K, Cheng Y-S, Hutton JL, Chiu C, Carr CM. 2009. Yeast Sec1p Functions before  
907 and after Vesicle Docking. *Mol Biol Cell* **20**:4673--4685. doi:10.1091/mbc.e09-02-0172
- 908 Hattendorf DA, Andreeva A, Gangar A, Brennwald PJ, Weis WI. 2007. Structure of the yeast  
909 polarity protein Sro7 reveals a SNARE regulatory mechanism. *Nature* **446**:567–571.  
910 doi:10.1038/nature05635
- 911 Heider MR, Gu M, Duffy CM, Mirza AM, Marcotte LL, Walls AC, Farrall N, Hakhverdyan Z,  
912 Field MC, Rout MP, Frost A, Munson M. 2016. Subunit connectivity, assembly determinants  
913 and architecture of the yeast exocyst complex. *Nat Struct Mol Biol* **23**:59–66.  
914 doi:10.1038/nsmb.3146
- 915 Highland CM, Fromme JC. 2021. Arf1 directly recruits the Pik1-Frq1 PI4K complex to regulate  
916 the final stages of Golgi maturation. *Mol Biol Cell* mbc.E21-02-0069. doi:10.1091/mbc.e21-  
917 02-0069
- 918 Hong W, Lev S. 2014. Tethering the assembly of SNARE complexes. *Trends Cell Biol* **24**:35–  
919 43. doi:10.1016/j.tcb.2013.09.006

- 920 Hu S-H, Latham CF, Gee CL, James DE, Martin JL. 2007. Structure of the Munc18c/Syntaxin4  
921 N-peptide complex defines universal features of the N-peptide binding mode of Sec1/Munc18  
922 proteins. *Proc National Acad Sci* **104**:8773–8778. doi:10.1073/pnas.0701124104
- 923 Jin Y, Sultana A, Gandhi P, Franklin E, Hamamoto S, Khan AR, Munson M, Schekman R,  
924 Weisman LS. 2011. Myosin V Transports Secretory Vesicles via a Rab GTPase Cascade and  
925 Interaction with the Exocyst Complex. *Dev Cell* **21**:1156–1170.  
926 doi:10.1016/j.devcel.2011.10.009
- 927 Jun Y, Wickner W. 2019. Sec17 ( $\alpha$ -SNAP) and Sec18 (NSF) restrict membrane fusion to R-  
928 SNAREs, Q-SNAREs, and SM proteins from identical compartments. *Proc National Acad*  
929 *Sci* **116**:23573–23581. doi:10.1073/pnas.1913985116
- 930 Kabcenell AK, Goud B, Northup JK, Novick PJ. 1990. Binding and hydrolysis of guanine  
931 nucleotides by Sec4p, a yeast protein involved in the regulation of vesicular traffic. *J*  
932 *Biological Chem* **265**:9366–72.
- 933 Kustermann J, Wu Y, Rieger L, Dedden D, Phan T, Walther P, Dünkler A, Johnsson N. 2017.  
934 The cell polarity proteins Boi1p and Boi2p stimulate vesicle fusion at the plasma membrane  
935 of yeast cells. *J Cell Sci* **130**:2996–3008. doi:10.1242/jcs.206334
- 936 Lambert TJ. 2019. FPbase: a community-editable fluorescent protein database. *Nat Methods*  
937 **16**:277–278. doi:10.1038/s41592-019-0352-8
- 938 Lawrimore J, Bloom KS, Salmon ED. 2011. Point centromeres contain more than a single  
939 centromere-specific Cse4 (CENP-A) nucleosome. *J Cell Biology* **195**:573–582.  
940 doi:10.1083/jcb.201106036
- 941 Lehman K, Rossi G, Adamo JE, Brennwald P. 1999. Yeast Homologues of Tomosyn and lethal  
942 giant larvae Function in Exocytosis and Are Associated with the Plasma Membrane Snare,  
943 Sec9. *J Cell Biology* **146**:125–140. doi:10.1083/jcb.146.1.125
- 944 Lillie SH, Brown SS. 1994. Immunofluorescence localization of the unconventional myosin,  
945 Myo2p, and the putative kinesin-related protein, Smy1p, to the same regions of polarized  
946 growth in *Saccharomyces cerevisiae*. *J Cell Biology* **125**:825–842. doi:10.1083/jcb.125.4.825
- 947 Lillie SH, Brown SS. 1992. Suppression of a myosin defect by a kinesin-related gene. *Nature*  
948 **356**:358–361. doi:10.1038/356358a0
- 949 Longtine MS, III AM, Demarini DJ, Shah NG, Wach A, Brachat A, Philippsen P, Pringle JR.  
950 1998. Additional modules for versatile and economical PCR-based gene deletion and  
951 modification in *Saccharomyces cerevisiae*. *Yeast* **14**:953–961. doi:10.1002/(sici)1097-  
952 0061(199807)14:10<953::aid-yea293>3.0.co;2-u

- 953 Lwin KM, Li D, Bretscher A. 2016. Kinesin-related Smy1 enhances the Rab-dependent  
954 association of myosin-V with secretory cargo. *Mol Biol Cell* **27**:2450–62.  
955 doi:10.1091/mbc.e16-03-0185
- 956 Masgrau A, Battola A, Sanmartin T, Pryszcz LP, Gabaldón T, Mendoza M. 2017. Distinct roles  
957 of the polarity factors Boi1 and Boi2 in the control of exocytosis and abscission in budding  
958 yeast. *Mol Biol Cell* **28**:3082–3094. doi:10.1091/mbc.e17-06-0404
- 959 Mei K, Li Y, Wang S, Shao G, Wang J, Ding Y, Luo G, Yue P, Liu J-J, Wang X, Dong M-Q,  
960 Wang H-W, Guo W. 2018. Cryo-EM structure of the exocyst complex. *Nat Struct Mol Biol*  
961 **25**:139–146. doi:10.1038/s41594-017-0016-2
- 962 Morgera F, Sallah MR, Dubuke ML, Gandhi P, Brewer DN, Carr CM, Munson M. 2012.  
963 Regulation of exocytosis by the exocyst subunit Sec6 and the SM protein Sec1. *Mol Biol Cell*  
964 **23**:337–46. doi:10.1091/mbc.e11-08-0670
- 965 Novick P. 2016. Regulation of membrane traffic by Rab GEF and GAP cascades. *Small Gtpases*  
966 **7**:252–256. doi:10.1080/21541248.2016.1213781
- 967 Novick P, Field C, Schekman R. 1980. Identification of 23 complementation groups required for  
968 post-translational events in the yeast secretory pathway. *Cell* **21**. doi:10.1016/0092-  
969 8674(80)90128-2
- 970 Novick PJ. 2014. A pathway of a hundred genes starts with a single mutant: Isolation of sec1-1.  
971 *Proc National Acad Sci* **111**:9019–9020. doi:10.1073/pnas.1404892111
- 972 Pagni M, Ioannidis V, Cerutti L, Zahn-Zabal M, Jongeneel CV, Hau J, Martin O, Kuznetsov D,  
973 Falquet L. 2007. MyHits: improvements to an interactive resource for analyzing protein  
974 sequences. *Nucleic Acids Res* **35**:W433–W437. doi:10.1093/nar/gkm352
- 975 Pan X, Eathiraj S, Munson M, Lambright DG. 2006. TBC-domain GAPs for Rab GTPases  
976 accelerate GTP hydrolysis by a dual-finger mechanism. *Nature* **442**:303–306.  
977 doi:10.1038/nature04847
- 978 Picco A, Irastorza-Azcarate I, Specht T, Böke D, Pazos I, Rivier-Cordey A-S, Devos DP,  
979 Kaksonen M, Gallego O. 2017. The In Vivo Architecture of the Exocyst Provides Structural  
980 Basis for Exocytosis. *Cell* **168**:400-412.e18. doi:10.1016/j.cell.2017.01.004
- 981 Picco A, Mund M, Ries J, Nédélec F, Kaksonen M. 2015. Visualizing the functional architecture  
982 of the endocytic machinery. *Elife* **4**:e04535. doi:10.7554/elife.04535
- 983 Rathore SS, Bend EG, Yu H, Hammarlund M, Jorgensen EM, Shen J. 2010. Syntaxin N-terminal  
984 peptide motif is an initiation factor for the assembly of the SNARE–Sec1/Munc18 membrane  
985 fusion complex. *Proc National Acad Sci* **107**:22399–22406. doi:10.1073/pnas.1012997108

- 986 Rinaldi FC, Packer M, Collins R. 2015. New insights into the molecular mechanism of the Rab  
987 GTPase Sec4p activation. *Bmc Struct Biol* **15**:14. doi:10.1186/s12900-015-0041-5
- 988 Robinson NGG, Guo L, Imai J, Toh-e A, Matsui Y, Tamanoi F. 1999. Rho3 of *Saccharomyces*  
989 *cerevisiae*, Which Regulates the Actin Cytoskeleton and Exocytosis, Is a GTPase Which  
990 Interacts with Myo2 and Exo70. *Mol Cell Biol* **19**:3580–3587. doi:10.1128/mcb.19.5.3580
- 991 Rossi G, Lepore D, Kenner L, Czuchra AB, Plooster M, Frost A, Munson M, Brennwald P.  
992 2020. Exocyst structural changes associated with activation of tethering downstream of  
993 Rho/Cdc42 GTPases Activation of the exocyst by Rho/Cdc42 GTPases. *The Journal of Cell*  
994 *Biology* **219**. doi:10.1083/jcb.201904161
- 995 Rossi G, Watson K, Demonch M, Temple B, Brennwald P. 2014. In Vitro Reconstitution of Rab  
996 GTPase-dependent Vesicle Clustering by the Yeast Lethal Giant Larvae/Tomosyn Homolog,  
997 Sro7. *J Biol Chem* **290**:612–624. doi:10.1074/jbc.m114.595892
- 998 Rossi G, Watson K, Kennedy W, Brennwald P. 2018. The tomosyn homolog, Sro7, is a direct  
999 effector of the Rab GTPase, Sec4, in post-golgi vesicle tethering. *Mol Biol Cell*.  
1000 doi:10.1091/mbc.e18-02-0138
- 1001 Salter J. 2016. blindanalysis: v1.0. doi:10.5281/zenodo.44678
- 1002 Santiago-Tirado FH, Legesse-Miller A, Schott D, Bretscher A. 2011. PI4P and Rab Inputs  
1003 Collaborate in Myosin-V-Dependent Transport of Secretory Compartments in Yeast. *Dev Cell*  
1004 **20**:47--59. doi:10.1016/j.devcel.2010.11.006
- 1005 Schott D, Ho J, Pruyne D, Bretscher A. 1999. The CooH-Terminal Domain of Myo2p, a Yeast  
1006 Myosin V, Has a Direct Role in Secretory Vesicle Targeting. *J Cell Biology* **147**:791–808.  
1007 doi:10.1083/jcb.147.4.791
- 1008 Schott DH, Collins RN, Bretscher A. 2002. Secretory vesicle transport velocity in living cells  
1009 depends on the myosin-V lever arm length. *J Cell Biology* **156**:35–40.  
1010 doi:10.1083/jcb.200110086
- 1011 Schulze KL, Littleton JT, Salzberg A, Halachmi N, Stern M, Lev Z, Bellen HJ. 1994. rop, a  
1012 *Drosophila* homolog of yeast Sec1 and vertebrate n-Sec1/Munc-18 proteins, is a negative  
1013 regulator of neurotransmitter release in vivo. *Neuron* **13**:1099–108. doi:10.1016/0896-  
1014 6273(94)90048-5
- 1015 Shaner NC, Lambert GG, Chammas A, Ni Y, Cranfill PJ, Baird MA, Sell BR, Allen JR, Day  
1016 RN, Israelsson M, Davidson MW, Wang J. 2013. A bright monomeric green fluorescent  
1017 protein derived from *Branchiostoma lanceolatum*. *Nat Methods* **10**:407–409.  
1018 doi:10.1038/nmeth.2413
- 1019 Sievers F, Wilm A, Dineen D, Gibson TJ, Karplus K, Li W, Lopez R, McWilliam H, Remmert  
1020 M, Söding J, Thompson JD, Higgins DG. 2011. Fast, scalable generation of high-quality

- 1021 protein multiple sequence alignments using Clustal Omega. *Mol Syst Biol* **7**:539–539.  
1022 doi:10.1038/msb.2011.75
- 1023 Song H, Orr A, Duan M, Merz AJ, Wickner W. 2017. Sec17/Sec18 act twice, enhancing  
1024 membrane fusion and then disassembling cis-SNARE complexes. *Elife* **6**:e26646.  
1025 doi:10.7554/elife.26646
- 1026 Stalder D, Mizuno-Yamasaki E, Ghassemian M, Novick PJ. 2013. Phosphorylation of the Rab  
1027 exchange factor Sec2p directs a switch in regulatory binding partners. *Proc National Acad Sci*  
1028 **110**:19995–20002. doi:10.1073/pnas.1320029110
- 1029 Stalder D, Novick PJ. 2016. The casein kinases Yck1p and Yck2p act in the secretory pathway,  
1030 in part, by regulating the Rab exchange factor Sec2p. *Mol Biol Cell* **27**:686–701.  
1031 doi:10.1091/mbc.e15-09-0651
- 1032 Thomas LL, Fromme JC. 2016. GTPase cross talk regulates TRAPPII activation of Rab11  
1033 homologues during vesicle biogenesis Arf1 regulates activation of Rab11 homologues. *J Cell*  
1034 *Biology* **215**:499–513. doi:10.1083/jcb.201608123
- 1035 Thomas LL, Vegt SA van der, Fromme JC. 2019. A Steric Gating Mechanism Dictates the  
1036 Substrate Specificity of a Rab-GEF. *Dev Cell* **48**:100-114.e9.  
1037 doi:10.1016/j.devcel.2018.11.013
- 1038 Togneri J, Cheng Y-S, Munson M, Hughson FM, Carr CM. 2006. Specific SNARE complex  
1039 binding mode of the Sec1/Munc-18 protein, Sec1p. *Proc National Acad Sci* **103**:17730–  
1040 17735. doi:10.1073/pnas.0605448103
- 1041 Walch-Solimena C, Collins RN, Novick PJ. 1997. Sec2p Mediates Nucleotide Exchange on  
1042 Sec4p and Is Involved in Polarized Delivery of Post-Golgi Vesicles. *J Cell Biology*  
1043 **137**:1495–1509. doi:10.1083/jcb.137.7.1495
- 1044 Waterhouse AM, Procter JB, Martin DMA, Clamp M, Barton GJ. 2009. Jalview Version 2—a  
1045 multiple sequence alignment editor and analysis workbench. *Bioinformatics* **25**:1189–1191.  
1046 doi:10.1093/bioinformatics/btp033
- 1047 Watson K, Rossi G, Temple B, Brennwald P. 2015. Structural basis for recognition of the Sec4  
1048 Rab GTPase by its effector, the Lgl/tomosyn homologue, Sro7. *Mol Biol Cell* **26**:3289--3300.  
1049 doi:10.1091/mbc.e15-04-0228
- 1050 Weber M, Chernov K, Turakainen H, Wohlfahrt G, Pajunen M, Savilahti H, Jääntti J. 2010.  
1051 Mso1p Regulates Membrane Fusion through Interactions with the Putative N-Peptide-binding  
1052 Area in Sec1p Domain 1. *Mol Biol Cell* **21**:1362–1374. doi:10.1091/mbc.e09-07-0546
- 1053 Weber-Boyvatt M, Zhao H, Aro N, Yuan Q, Chernov K, Peränen J, Lappalainen P, Jääntti J. 2012.  
1054 A conserved regulatory mode in exocytic membrane fusion revealed by Mso1p membrane  
1055 interactions. *Mol Biol Cell* **24**:331–41. doi:10.1091/mbc.e12-05-0415

- 1056 Wiederkehr A, Du Y, Pypaert M, Ferro-Novick S, Novick P. 2003. Sec3p is needed for the  
1057 spatial regulation of secretion and for the inheritance of the cortical endoplasmic reticulum.  
1058 *Mol Biol Cell* **14**:4770--4782. doi:10.1091/mbc.e03-04-0229
- 1059 Wu H, Turner C, Gardner J, Temple B, Brennwald P. 2009. The Exo70 subunit of the exocyst is  
1060 an effector for both Cdc42 and Rho3 function in polarized exocytosis. *Mol Biol Cell* **21**:430–  
1061 42. doi:10.1091/mbc.e09-06-0501
- 1062 Zhang W, Efanov A, Yang S-N, Fried G, Kölare S, Brown H, Zaitsev S, Berggren P-O, Meister  
1063 B. 2000. Munc-18 Associates with Syntaxin and Serves as a Negative Regulator of  
1064 Exocytosis in the Pancreatic  $\beta$ -Cell\*. *J Biol Chem* **275**:41521–41527.  
1065 doi:10.1074/jbc.m005479200
- 1066 Zhang X, Wang P, Gangar A, Zhang J, Brennwald P, TerBush D, Guo W. 2005. Lethal giant  
1067 larvae proteins interact with the exocyst complex and are involved in polarized exocytosis. *J*  
1068 *Cell Biology* **170**:273–283. doi:10.1083/jcb.200502055
- 1069  
1070
